1 **Title: A structural dendrogram of the actinobacteriophage major capsid proteins**  
2 **provides important structural insights into the evolution of capsid stability**

3  
4 **Authors:** Jennifer M. Podgorski<sup>1</sup>, Krista Freeman<sup>2</sup>, Sophia Gosselin<sup>1</sup>, Alexis Huet<sup>3</sup>,  
5 James F. Conway<sup>3</sup>, Mary Bird<sup>1</sup>, John Grecco<sup>1</sup>, Shreya Patel<sup>1</sup>, Deborah Jacobs-Sera<sup>2</sup>,  
6 Graham Hatfull<sup>2</sup>, Johann Peter Gogarten<sup>1,4</sup>, Janne Ravantti<sup>5</sup>, Simon White<sup>1\*</sup>

7  
8 **Affiliations**

9  
10 **1.** Biology/Physics Building, Department of Molecular and Cell Biology, University of Connecticut, 91  
11 North Eagleville Road, Unit-3125. Storrs, CT 06269-3125, USA

12  
13 **2.** Clapp Hall, Department of Biological Sciences, University of Pittsburgh, 4249 Fifth Avenue, Pittsburgh,  
14 PA 15260, USA

15 **3.** Department of Structural Biology, University of Pittsburgh School of Medicine, Pittsburgh, PA, USA.

16 **4.** Institute for Systems Genomics, University of Connecticut, Storrs, CT 06268-3125, USA.

17 **5.** University of Helsinki, Molecular and Integrative Biosciences Research Programme, Helsinki, Finland.

18  
19 \* Author to whom correspondence should be addressed.

20

21

22

23

24

25 **Abstract**

26

27 Many double-stranded DNA viruses, including tailed bacteriophages (phages) and  
28 herpesviruses, use the HK97-fold in their major capsid protein to make the capsomers  
29 of the icosahedral viral capsid. Following the genome packaging at near-crystalline  
30 densities, the capsid is subjected to a major expansion and stabilization step that allows  
31 it to withstand environmental stresses and internal high pressure. Several different  
32 mechanisms for stabilizing the capsid have been structurally characterized, but how  
33 these mechanisms have evolved is still not understood. Using cryo-EM structure  
34 determination, structural comparisons, phylogenetic analyses, and Alphafold  
35 predictions, we have constructed a detailed structural dendrogram describing the  
36 evolution of capsid structural stability within the actinobacteriophages. The cryo-EM  
37 reconstructions of ten capsids solved to resolutions between 2.2 and 4 Ångstroms  
38 revealed that eight of them exhibit major capsid proteins that are linked by a covalent  
39 cross-linking (isopeptide bond) between subunits that was first described in the HK97  
40 phage. Those covalent interactions ultimately lead to the formation of mutually  
41 interlinked capsomers that has been compared to the structure of chain mail. However,  
42 three of the closely related phages do not exhibit such an isopeptide bond as  
43 demonstrated by both our cryo-EM maps and the lack of the required residue. This work  
44 raises questions about the importance of previously described capsid stabilization  
45 mechanisms.



## 46 **Introduction**

47

48 The HK97-fold (Figure 1 A) is ubiquitous in the biosphere and has been identified in  
49 viruses that infect the three domains of life<sup>1,2,3</sup>, as well as encapsulins<sup>4</sup>: protein shells  
50 used by bacteria for gene transfer and reaction confinement<sup>5</sup>. It is found across the  
51 Caudovirales order (the double-stranded DNA tailed phages), which is one of the  
52 largest groups of viruses in the biosphere and plays major roles in bacterial evolution  
53 and in carbon/nitrogen/phosphorus cycling<sup>6</sup>. Actinobacteriophages (bacteriophages  
54 infecting actinobacterial hosts) have been intensively studied with over 20,000 individual  
55 isolates, the vast majority of which are dsDNA phages. These phages are the central  
56 focus of integrated research-education programs<sup>7,8</sup>, have provided tools for  
57 *Mycobacterium* genetics<sup>9</sup>, and show promise as therapies for drug-resistant  
58 *Mycobacterium* infections<sup>10,11</sup>.

59

60 Most of the major capsid proteins in the tailed phages use the HK97-fold (Figure 1 A) as  
61 the foundational block to build the capsid (Figure 1 B). To date, all structurally  
62 characterized HK97-folds have several conserved domains<sup>12,13</sup>. They include the A  
63 domain (Figure 1A, teal) that forms the central core of the hexamer and pentamer  
64 capsomers of the capsid; the P-domain (Figure 1A, magenta) where the long spine helix  
65 is located; as well as the E-loop (Figure 1A, purple) and N-arm (Figure 1A, green). The  
66 E-loop and N-arm make long-range contacts with other major capsid proteins and play  
67 important roles in capsid stability<sup>14</sup>. The viral major capsid protein that uses the HK97-

68 fold is assembled into an icosahedral shell consisting of eleven pentamers and different  
69 numbers of hexamers of the major capsid protein depending on the size and shape of

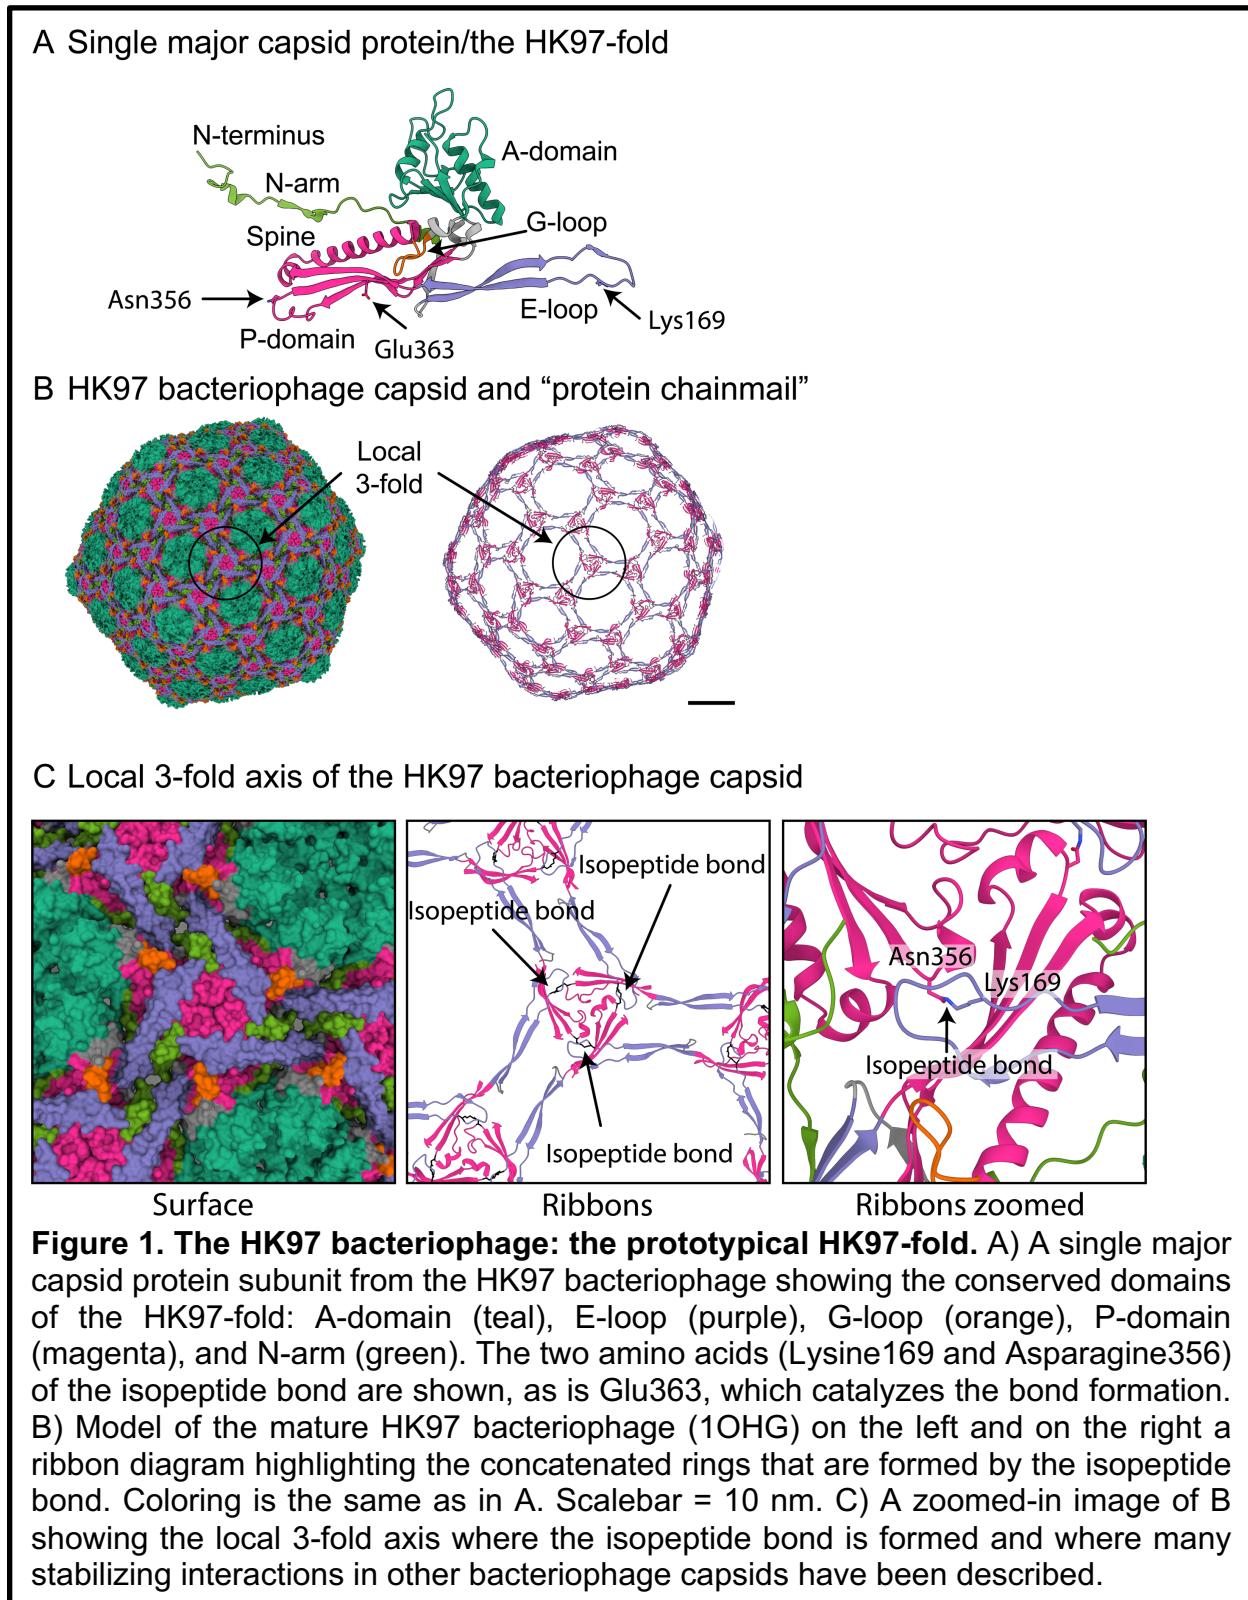

70 the capsid. The icosahedral capsid is described by a T number that defines the number  
71 of major capsid proteins in the icosahedral shell - equal to the T number multiplied by  
72 sixty<sup>15</sup>. Within the dsDNA tailed phages, one pentamer is replaced by the portal to which  
73 the tail is bound and through which the DNA is packaged and then released.

74

75 The stability of the mature capsid is a key factor in the evolutionary success of  
76 phages<sup>16</sup>. The capsid needs to withstand various environmental conditions, and the  
77 pressure of the packed DNA genome<sup>17,18,19</sup>. The local 3-fold axes for each capsomer,  
78 where the P-domains of the pentamer and hexamer capsomers intersect, are thought to  
79 be important for capsid stability<sup>16</sup> (Figure 1 B and C highlights one such 3-fold axis in  
80 the HK97-fold). The tailed phages use several different mechanisms to stabilize the  
81 capsid local 3-fold axes. The most common is a minor capsid protein, or 'cement', that  
82 binds to the local 3-fold axis and makes several contacts with the surrounding major  
83 capsid subunits<sup>20,21</sup>. Others use catenated rings, with either non-covalent<sup>22</sup> or covalent  
84 bonding<sup>23</sup> mechanisms, that connect the major capsid proteins around the local 3-fold  
85 axis<sup>14</sup>. The major capsid protein of the HK97 phage (in which the HK97-fold was first  
86 characterized) uses a covalent isopeptide bond to cross-link a conserved asparagine  
87 (Asn356) in the P-domain of one major capsid protein with a conserved lysine (Lys169)  
88 in an adjacent E-loop of a different major capsid protein<sup>23</sup> (Figure 1 B and C). The  
89 cross-linking is catalyzed by a nearby glutamic acid (Glu363) on a third major capsid  
90 protein subunit and aided by three other amino acids that form a hydrophobic pocket<sup>24</sup>.  
91 The cross-linking of all the major capsid proteins results in the catenated rings or  
92 "protein chainmail" that stabilizes the capsid around the local 3-fold axes (Figure 1 C).

93 Some phages have been characterized, for example, T5<sup>25</sup>, T7<sup>26</sup>, and phiRSA1<sup>27</sup>, that  
94 rely solely on intracapsomeric interactions and do not use cement or non-  
95 covalent/covalent bonding mechanisms. These different mechanisms of capsid  
96 stabilization make the HK97-fold highly adaptable and able to survive a wide variety of  
97 environments, from soil to hot springs and allows for the formation of structurally very  
98 diverse capsids that range in size from relatively small 50 nm diameter capsids<sup>28,29,30</sup> to  
99 hundreds of nanometers in diameter “giant” capsids<sup>31,32</sup>.

100

101 High-resolution structures of over twenty-five tailed phage capsids<sup>21-50</sup>, viruses that  
102 infect archaea<sup>2</sup>, and the human pathogenic Herpesvirus<sup>3</sup> show that the HK97-fold is well  
103 conserved, even among viral capsids sharing little or no amino acid sequence similarity  
104 and using several different capsid stability mechanisms. However, these structures are  
105 from viruses that infect diverse hosts across all three domains of life and are so  
106 divergent from one another that only limited conclusions can be made about their  
107 evolution. We, therefore, carried out a systematic investigation of closely related phages  
108 infecting actinobacterial hosts to understand how capsid stability mechanisms are  
109 conserved and how they have evolved.

110

111

112

113

114

115

## 116 **Materials and Methods**

### 117 ***Production and purification of Phages for Cryo-Electron Microscopy***

118 Phages were produced as previously described<sup>51</sup>. Briefly, twenty webbed plates were  
119 made for each phage with their host (Supporting Information Table 1) in top agar on  
120 Luria agar plates and incubated overnight at the temperatures shown in Supporting  
121 Information Table 1. Phages were extracted from the webbed plates using 5 mL of  
122 Phage Buffer (10 mM Tris-HCl pH 7.5, 10 mM MgSO<sub>4</sub>, 68 mM NaCl, 1 mM CaCl<sub>2</sub>) and  
123 incubated overnight at room temperature to allow diffusion of the phages into the Phage  
124 Buffer. The lysate was aspirated from the plates and centrifuged at 12,000× *g* for 15 min  
125 at 4 °C to remove cell debris. Phage particles were then pelleted using an SW41Ti  
126 swinging bucket rotor (Beckman Coulter, Brea, CA) at 30,000 rpm for 3 hours using  
127 12.5 mL open-top poly clear tubes (Seton Scientific, Petaluma, CA). The phage  
128 particles in the pellet were then resuspended in 7 mL of Phage Buffer by gentle rocking  
129 overnight at 4 °C. The new phage lysate was subjected to isopycnic centrifugation with  
130 the addition of 5.25 g of CsCl to the 7 mL of phage lysate. The CsCl/phage solutions  
131 were centrifuged at 40,000 rpm in an S50-ST swinging bucket rotor (Thermofisher  
132 Scientific, Waltham, MA) for 16 h and the phage particle band (that appeared roughly  
133 halfway down the tube) was removed via side puncture with a syringe and needle.  
134 Phage particles were then dialyzed three times against Phage Buffer to remove CsCl.  
135 To do this the ~1 mL of purified phages was placed into a Tube-O-Dialyzer Micro (G-  
136 Biosciences, St Louis, MO) with a 50 kDa molecular weight cut-off. The phages were  
137 then concentrated a final time by pelleting them at 75000 rpm in an S120-AT2 fixed

138 angle rotor (Beckman Coulter, Brea, CA). The phage particles were then resuspended  
139 in 20  $\mu$ L of Phage Buffer with gentle pipetting.

140

#### 141 ***Preparation of Cryo-Electron Microscopy Grids***

142 Five microliters of concentrated phage particles (approximately 10 mg/mL) were added  
143 to Au-flat 2/2 (2  $\mu$ m hole, 2  $\mu$ m space) cryo-electron microscopy grid (Protochips,  
144 Morrisville, NC, USA) using a Vitrobot Mk IV (Thermo Fisher Scientific, Waltham,  
145 Massachusetts, USA). Grids were blotted for 5 s with a force of 5 (a setting on the  
146 Vitrobot) before being plunged into liquid ethane. For Muddy phage, three microliters of  
147 concentrated phage particles were added to a freshly glow-discharged Quantifoil R2/1  
148 grid (Quantifoil Micro Tools GmbH, Großlöbicha, Germany) and plunge-frozen with a  
149 Vitrobot Mk IV into a 50:50 mixture of liquid ethane:propane<sup>52</sup>

150

#### 151 ***Cryo-Electron Microscopy***

152 Data were collected on a 300 keV Titan Krios (Thermo Fisher Scientific, Waltham,  
153 Massachusetts, USA) at the Pacific Northwest Center for Cryo-EM with either a K3 or  
154 Falcon 3 direct electron detector (Gatan, Pleasanton, CA, USA). The data for Muddy  
155 was collected on a 300 keV Titan Krios 3Gi at the University of Pittsburgh with a Falcon  
156 3 direct electron detector (Thermo Fisher Scientific, Waltham, Massachusetts, USA).  
157 Supporting Table 2 provides the collection parameters for each phage.

158

## 159 ***Cryo-Electron Microscopy Data Analysis***

160 Relion 3.1.1<sup>53</sup> was used for phage capsid reconstructions using the standard workflow.  
161 CTF Refinement was performed using the default settings. Bayesian polishing was not  
162 performed since it made little improvement on resolution (approx. 0.1 Å for Bobi when  
163 attempted) for the computational time. Ewald sphere correction was carried out for each  
164 particle using the `relion_image_handler` command that is included with Relion. The  
165 `mask_diameter` value used in the Ewald sphere correction is reported in Supporting  
166 Table 2.

167

## 168 ***De novo model building***

169 The amino acid sequences of the major capsid proteins were folded with AlphaFold<sup>54</sup>  
170 version 2.0 using the default settings on a local workstation. The highest ranked  
171 prediction model was fitted into the cryo-EM map using ChimeraX<sup>55</sup> version 1.3 and the  
172 “Fit in Map” command. Coot<sup>56</sup> version 0.9.2 was then used to manually fit the model into  
173 the density using the “Stepped sphere refine active chain” provided by the python script  
174 developed by Oliver Clarke<sup>57</sup>. Any remaining protein backbone that was incorrectly  
175 placed was then manually moved into the correct density. All maps were of sufficient  
176 quality for side chains to be easily recognizable. The real-space refinement tool of  
177 Phenix<sup>58</sup> version 1.19.2-4158 was used with default settings to refine the model and  
178 Coot was then used to manually fix the majority of the issues identified through Phenix.  
179 The final step was to use the ChimeraX plugin, Isolde<sup>59</sup> version 1.3, to refine the major  
180 capsid protein model. The whole model simulation was used with a temperature of 20  
181 °K. All other parameters were default. After the first model was completed, the



182 asymmetric unit of the capsid was created using a similar workflow with a final Isolde  
183 refinement of the entire asymmetric unit.

184

### 185 **Phylogenetic analysis of the major capsid protein amino acid sequences**

186 Amino acid sequences of the three major capsid protein phams (named as of July 2021:  
187 4631, 15199, 57445) were downloaded from PhagesDB<sup>60</sup> and merged into a single  
188 multifasta file. The divergent nature of these protein sequences required an alignment  
189 algorithm that could permit a large number of gaps in our multiple sequence alignment.  
190 To that end, we aligned the major capsid proteins using MAFFT (v7.453)<sup>61</sup> with the  
191 following parameters: globalpair, unalignlevel 0.8, leavegappyregion, and maxiterate  
192 1000.

193

194 A maximum likelihood phylogeny was created from the multiple sequence alignment  
195 using IQTree (v1.6.6)<sup>62</sup> with the following parameters: ModelFinder Plus<sup>63</sup> (-m MFP),  
196 and 100 non-parametric bootstraps (-bb 100). The model finder chose an LG model with  
197 empirical frequencies and five rate categories (LG+F+R5) as the most likely model  
198 based on the Bayesian information criterion. The resulting phylogeny was visualized in  
199 Figtree (v1.4.4)<sup>64</sup>. Nodes were collapsed only when the collapsed node contained a  
200 single pham from a single phage subcluster.

201

### 202 **Alphafold of major capsid proteins**

203 To create the structural dendrogram, we used Alphafold to predict the three-dimensional  
204 protein fold of a representative major capsid protein from each cluster (139 total



205 clusters), as well as every Singleton (62) major capsid protein. All protein sequences  
206 were obtained from the actinobacteriophage database (PhagesDB)<sup>60</sup> and Phamerator<sup>65</sup>  
207 in July 2021. For the few clusters (A, BN, CZ, DN, and F) that have more than one  
208 major capsid protein phamily, we folded a representative of each major capsid protein  
209 phamily from that cluster. There are forty-two annotated major capsid protein phamilies  
210 in the actinobacteriophages, spread across the 201 clusters and Singletons. In total, five  
211 clusters (DK, DS, EK, EM, and FC) and eight Singletons have no annotated major  
212 capsid protein and were therefore excluded from this analysis. The 18 total excluded  
213 phages account for less than 0.5% of the total number of annotated  
214 actinobacteriophages, so their exclusion is unlikely to skew the results. Cluster BO,  
215 which contains two phages, was also excluded from this analysis since they do not use  
216 the HK97-fold in their major capsid protein and are part of the Tectiviridae family of  
217 viruses. In total, 201 major capsid proteins were predicted with the default Alphafold  
218 settings and the major capsid protein amino acid sequence as input. The model with the  
219 highest confidence was used in the structural map. PDB files were manually truncated  
220 to remove the N-arm and the delta domain if present. The N-arm was truncated to  
221 approximately where the N-arm crosses behind the spine helix of the major capsid  
222 protein. The fasta files and PDB files of the predicted full-length and truncated major  
223 capsid proteins can be found in Supporting Information.

224

### 225 **Creation of a structural dendrogram using Homologous Structure Finder**

226 In this study, we applied automatic structure alignment and the structure-based  
227 classification method Homologous Structure Finder (HSF)<sup>66</sup>, which allows

228 comprehensive comparisons of proteins, not only within a protein family (such as RNA-  
229 dependent RNA polymerase)<sup>67</sup> but also between protein families and superfamilies,  
230 significantly extending the depth of sequence-based phylogenies<sup>66</sup>. HSF identifies the  
231 equivalent residues for a pair of protein structures by comparing a set of amino acid  
232 properties (e.g., physiochemical properties of amino acids, local geometry, backbone  
233 direction, local alignment, and C $\alpha$  distances)<sup>66</sup>. The two protein structures that are the  
234 most similar based on the properties are merged into a common structural core which  
235 then represents the pair in the later iterations. Next, the structure or a core from a  
236 previous iteration, best matching to an existing core or to a single structure not in any  
237 core yet, is merged either to a core or to another structure. The iterations are continued  
238 until all the protein structures are part of a clustering and a single structural core is  
239 identified for all the proteins in the data set. The equivalent residues in the structural  
240 core can be considered homologous, similar to high-scoring columns of multiple  
241 sequence alignment.

242  
243 Pairwise comparison of the properties of the residues in the homologous positions of  
244 the common structural core between the original structures results in a pairwise  
245 distance matrix, which can be then used for constructing a structure-based distance  
246 tree<sup>66</sup>. The distances in such structure-based distance trees do not necessarily scale  
247 with respect to time, as changes in protein structure may not be continuous. However,  
248 the clustering of proteins in the structure-based distance tree constructed using HSF  
249 has been shown to follow the sequence-based classification of proteins into protein  
250 families, even when the common core contains less than 40 residues<sup>67</sup>. Thus, structure-

251 based analysis is appropriate for a rough estimation of evolutionary events and  
252 relationships between protein families when the proteins share little or no detectable  
253 sequence similarity, and the accuracy of estimation of the evolutionary events increases  
254 as the sequence similarity increases.

255

## 256 **Data Deposition**

257 PDB/EMDB/EMPIAR (unprocessed micrographs) accession numbers are as follows:

258

259 Adephagia: 8EC2/EMD-28012/EMPIAR-11200

260 Bobi: 8EC8/EMD-28015/EMPIAR-11201

261 Bridgette: 8ECI/EMD-28016/EMPIAR-11209

262 Cain: 8ECJ/EMD-28017/EMPIAR-11205

263 Che8: 8E16/EMD-27824/EMPIAR-11190

264 Cozz: 8ECK/EMD-28018/EMPIAR-11206

265 Muddy: 8EDU/EMD-28039/Not deposited in EMPIAR

266 Ogopogo: 8ECN/EMD-28020/EMPIAR-11207

267 Oxtober96: 8ECO/EMD-28021/EMPIAR-11208

268 Ziko: 8EB4/EMD-27992/EMPIAR-11195

## 269 **Results**

270

### 271 ***The actinobacteriophages have forty-two major capsid protein phamilies***

272 There are currently (August 2022) over 4000 sequenced and annotated  
273 actinobacteriophages, which can be grouped into over 139 clusters and sub-clusters.  
274 Clustering is based on shared gene content between phage genomes, such that a  
275 phage is included in a cluster if it shares at least 35% of its genes with any member of  
276 that cluster (e.g. Cluster A, Cluster B, etc). Therefore, phages within a cluster are  
277 generally more globally similar to one another than to phages in other clusters. Some  
278 clusters can be similarly divided into sub-clusters (e.g. Subcluster A1, Subcluster A2,  
279 etc). Clusters range from having just two members (e.g. Cluster X) to over seven  
280 hundred (Cluster A), with most having fewer than fifty. Additionally, there are sixty-six  
281 “Singletons” (August 2022), those phages that have a genome that does not fit into an  
282 existing cluster. These cluster/subcluster singleton groupings do not reflect firm  
283 biological distinctions, as phage genomes are pervasively architecturally mosaic, and  
284 phage populations likely span a continuum of diversity<sup>68</sup>.

285

286 The shared gene content comparison used for clustering is done at the protein level  
287 after genes have been translated and their products sorted into protein “phamilies”  
288 using Phamerator<sup>65</sup> and a pipeline built on MMseqs2 (Gauthier and Hatfull, manuscript  
289 in preparation)<sup>69</sup>. A phamily<sup>65</sup> is defined as a group of related proteins and although built  
290 with k-mer-based methods, proteins within a phamily typically have a minimum pairwise  
291 20% amino acid identity. Amino acid sequence analysis of approx. 3200 major capsid

292 proteins shows that there are forty-two major capsid protein families (termed  
293 phamilies/phams) within the actinobacteriophages database (July 2021). The majority of  
294 the 139 phage clusters have a single major capsid protein phamily and, as shown in this  
295 paper, it is possible to recapitulate most of the shared gene content-based phage  
296 clustering using only the major capsid protein.

297

### 298 ***The F1 sub-cluster contains three major capsid protein phamilies***

299 Because of the mosaic nature of phage genomes, some cluster/subcluster groups (e.g.  
300 A, BC, CZ, DN, and F) include multiple major capsid protein phamilies; Subcluster F1  
301 has the most with three different major capsid protein phamilies. Previous structural  
302 studies with the *Escherichia coli* CUS-3 and *Salmonella* P22 phages have shown that  
303 major capsid proteins with minimal amino acid sequence identity (less than 15%) can  
304 result in almost identical capsid morphologies and HK97-folds<sup>39,46</sup>. We, therefore,  
305 started the systematic investigation of the actinobacteriophages with the F1 major  
306 capsid proteins to address whether the three major capsid protein phamilies in the F1  
307 subcluster are the same HK97-fold with highly diverged amino acid sequences, or  
308 whether they are three distinct folds.

309

310 In total, 180 phages within the F1 subcluster use one of three major capsid protein  
311 phamilies; the three major capsid protein phamilies show a minimum of 97% amino acid  
312 sequence identity within a phamily and a maximum of 15% between the phamilies.  
313 Since the amino acid sequence identity is so high within each phamily, we chose a  
314 representative phage from each of the major capsid protein phamilies. These

315 representatives are Che8 (phamily/pham number 4611, major capsid protein, gene  
316 number = 6), Bobi (phamily 15199, major capsid protein, gene number = 7), and  
317 Ogotogo (phamily 57445, major capsid protein, gene number = 8) for structural  
318 analysis. Note: phamily numbers are subject to change but are accurate at the time of  
319 writing (August 2022). Cryo-electron microscopy was used to determine a sub 3 Å map  
320 (Figure 2 A) for each of the three representative phages (see Supporting Table 2 for  
321 collection parameters, analysis, and final resolutions). The capsids all use the T=9  
322 icosahedral architecture, with 540 copies of the major capsid protein, and are of similar  
323 size (740 Å diameter) and internal volumes (approx.  $3 \times 10^7$  Å<sup>3</sup>), which is expected since  
324 they package double-stranded DNA genomes of very similar length (Supporting Table  
325 1). The high-resolution data obtained from our studies allowed for *de novo* model  
326 building of the major capsid protein's amino acid sequence into the corresponding map.  
327 The resulting models of the three phages confirmed that each phage adopts the HK97-  
328 fold in their major capsid protein (Figure 2 B).

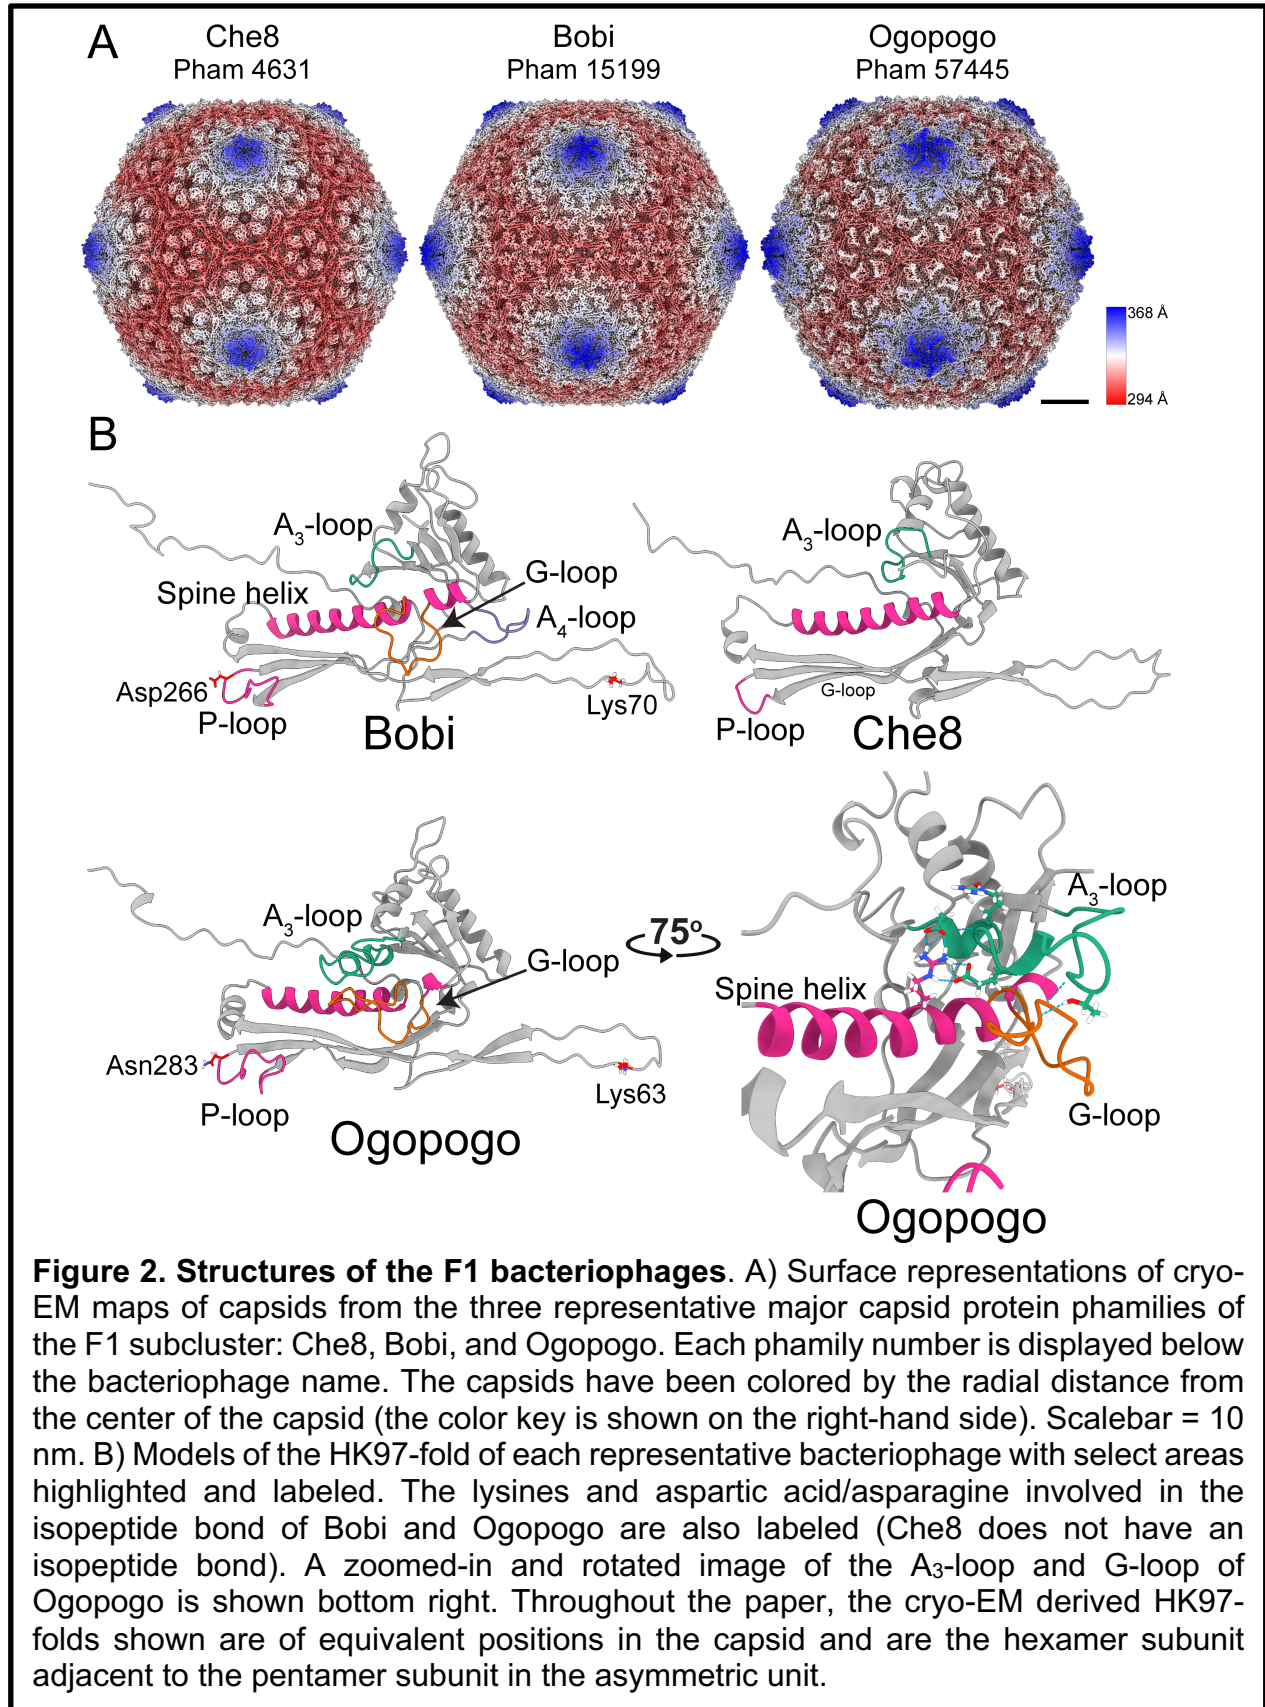



330 A comparison of the three major capsid proteins, which have ~15% amino acid  
331 sequence identity, revealed that the HK97-folds of the representative phages are very  
332 similar to one another (Figure 2), with Root Mean-Square Deviation (RMSD) of atomic  
333 position values <1.35 Å. While each fold is structurally similar to the original HK97-fold  
334 of the HK97 virus<sup>23</sup>, some key differences exist. Che8 lacks the G-loop that is found  
335 near the C-terminal end of the spine helix in the HK97 phage major capsid protein  
336 (Figure 1 A), therefore, Che8 has a continuous spine helix (Figure 2 B). Che8 also lacks  
337 the “protein chainmail” of the HK97 phage; the cryo-EM density map revealed that there  
338 was no density to suggest isopeptide bond formation, nor were there any amino acids in  
339 the correct location to potentially form an isopeptide bond. Unlike Che8, both Bobi and  
340 Ogopogo are more similar to HK97. They both contain a G-loop, although they are more  
341 extended when compared to the original HK97 fold. Ogopogo additionally has an  
342 extended A-loop that extends over the G-loop and makes important stabilizing contacts  
343 with the G-loop and spine helix (Figure 2 B, bottom right). The A-loop is in the same  
344 position as the A-loop of phage T7 where it was first characterized<sup>26</sup>; we name this the  
345 A<sub>3</sub>-loop. Bobi has an additional loop between the A and P domains, in a similar position  
346 to the A-pocket described in phage T7<sup>26</sup>; we name this the A<sub>4</sub>-loop. Ogopogo and Che8  
347 do not have the A<sub>4</sub>-loop. The A<sub>4</sub>-loop in Bobi does not make intermolecular interactions  
348 with other adjacent major capsid proteins, although it does make some intramolecular  
349 hydrogen bonds. However, the A<sub>4</sub>-loop is spatially very close to the A<sub>3</sub>-loop of an  
350 adjacent major capsid protein (discussed in more detail later). Furthermore, both Bobi  
351 and Ogopogo have an isopeptide bond, with clear density in the cryo-EM map showing  
352 the covalent link between a lysine (Bobi, lysine 70 and Ogopogo lysine 63) in the E-loop



353 and either aspartic acid or asparagine in the P-domain (Bobi, Asp 266 and Ogopogo  
354 Asn 283) of the adjacent major capsid protein: this demonstrates that they form the  
355 characteristic “protein chainmail” like the original HK97 fold. Ogopogo and Bobi both  
356 have an extended P-loop within the P-domain and three of these are found in close  
357 contact around the local 3-fold axis of the capsid. These P-loops will be discussed in  
358 greater detail later. This structural comparison of the three F1 major capsid protein  
359 phamilies suggested that the Che8-like phages may be more divergent from Bobi and  
360 Ogopogo.

361  
362 For simplicity, from this point on the major capsid protein phams will be called by the  
363 corresponding representative phage used in Figure 2; the Che8-like phages (pham  
364 4631); the Ogopogo-like phages (pham 57445) and the Bobi-like phages (pham 15199).

365

366 ***The three major capsid protein phamilies of the F1 subcluster constitute two***  
367 ***structural groups of major capsid protein in the actinobacteriophages***

368 To confirm the structural observations, we next put the three F1 major capsid protein  
369 phamilies into the broader context of the major capsid proteins from the  
370 actinobacteriophages database since focusing on just the three F1 phamilies would  
371 likely not reveal much insight into their level of evolutionary relationship due to their  
372 relatively high structural similarity. We, therefore, created a structural dendrogram of all  
373 the major capsid protein phamilies annotated in the actinobacteriophages (Figure 3).  
374 Previously, structural comparison of distantly related, yet conserved, protein folds has  
375 been used successfully to imply evolutionary links between viral capsid proteins; for

376 example, with the PRD1 and other double jelly-roll viral capsid proteins including  
377 adenovirus<sup>66,70,71</sup>, as well as showing a link between the dsDNA tailed phages and  
378 Herpes virus<sup>3</sup>.

379  
380 To create the structural dendrogram we used AlphaFold<sup>54</sup> to predict the three-  
381 dimensional HK97-folds of the major capsid proteins. Folding every major capsid protein  
382 in the actinobacteriophage database (over 3000 entries when the analysis was carried  
383 out in July 2021) was not feasible from a computational standpoint due to the large  
384 number of major capsid proteins. Therefore, we selected a representative major capsid  
385 protein from each cluster (139 total clusters at the time of analysis), as well as for every  
386 Singleton (62 at the time of analysis), as each Singleton could represent a future cluster  
387 distinct from the extant groups. For those clusters (A, BN, CZ, DN, and F) with more  
388 than one major capsid protein family, we folded a representative of each major capsid  
389 protein family from that cluster. In total, the structure of 201 major capsid proteins  
390 were predicted using AlphaFold and represent the forty-two annotated major capsid  
391 protein families of the actinobacteriophages.

392  
393 We validated a subset of the AlphaFold predictions with cryo-EM derived structures  
394 (Supporting Figure 1), revealing excellent agreement for most of the HK97-fold (RMSD  
395 values between 0.8 - 1 Ångstrom). While AlphaFold performs well for most of the fold,  
396 including the structured A-domain and P-domain, it does not as accurately predict the E-  
397 loop, and in most cases, the N-arm is badly predicted (Supporting Figure 2). These  
398 results concerning the E loop and N arm are understandable: the N-arm and E-loop

399 make long-range interactions with other major capsid proteins within the capsid and  
400 previous studies have shown quite different conformations of the same HK97-fold major  
401 capsid protein within its asymmetric unit and during its assembly, showing that both the  
402 E-loop and the N-arm are often in different positions and, consequently, hard to predict.

403

404 All tailed phages use a scaffolding protein domain during capsid assembly to create the  
405 empty capsid into which the viral DNA genome is packaged<sup>72</sup>. This scaffolding protein  
406 domain can be either an independent protein (called scaffolding protein) or an N-  
407 terminal extension of the major capsid protein sequence (called the delta domain) and  
408 in phage HK97 is cleaved from the major capsid protein after capsid assembly<sup>72</sup>.

409 Approximately 35% of the Alphafold predicted major capsid proteins from the  
410 actinobacteriophages had an N-terminal extension that was similar in size to the HK97  
411 phage delta domain. Some of the predicted delta domains in the actinobacteriophage  
412 major capsid proteins were almost as large (300 amino acids) as the major capsid  
413 protein and it is not possible to predict the cleavage site between the delta domain and  
414 the post-cleavage N-arm. We therefore manually truncated all the Alphafold predicted  
415 major capsid proteins to remove the N-terminal arm and the delta domain, if present, to  
416 make sure that we did not introduce bias from the N-arm and delta domains into the  
417 structural comparison. PDB-format files for the 201 full-length and truncated major  
418 capsid protein predictions can be found in Supporting Information.

419

420 These 201 truncated major capsid protein predictions were then used to create a major  
421 capsid protein structural dendrogram of the actinobacteriophages using the

422 Homologous Structure Finder algorithm<sup>66</sup> (Figure 3 A). The algorithm compares the  
423 three-dimensional Alphafold predictions and classifies the major capsid proteins on their  
424 structural similarity. The sophisticated classification methodology allows for the creation  
425 of a structural dendrogram whereby common structural elements between the major  
426 capsid proteins are identified and a common structural ancestor can be inferred. It has  
427 been used successfully for other protein fold lineages<sup>66,73</sup>. The major advantage of this  
428 methodology is for detecting similarities in protein folds even when no similarities  
429 remain in the amino acid sequences. The forty-two major capsid protein families  
430 within the actinobacteriophages have less than 20% amino acid sequence identity,  
431 meaning that comparison of the major capsid protein structures is the best way to reveal  
432 similarity and infer evolutionary links between the major capsid proteins.

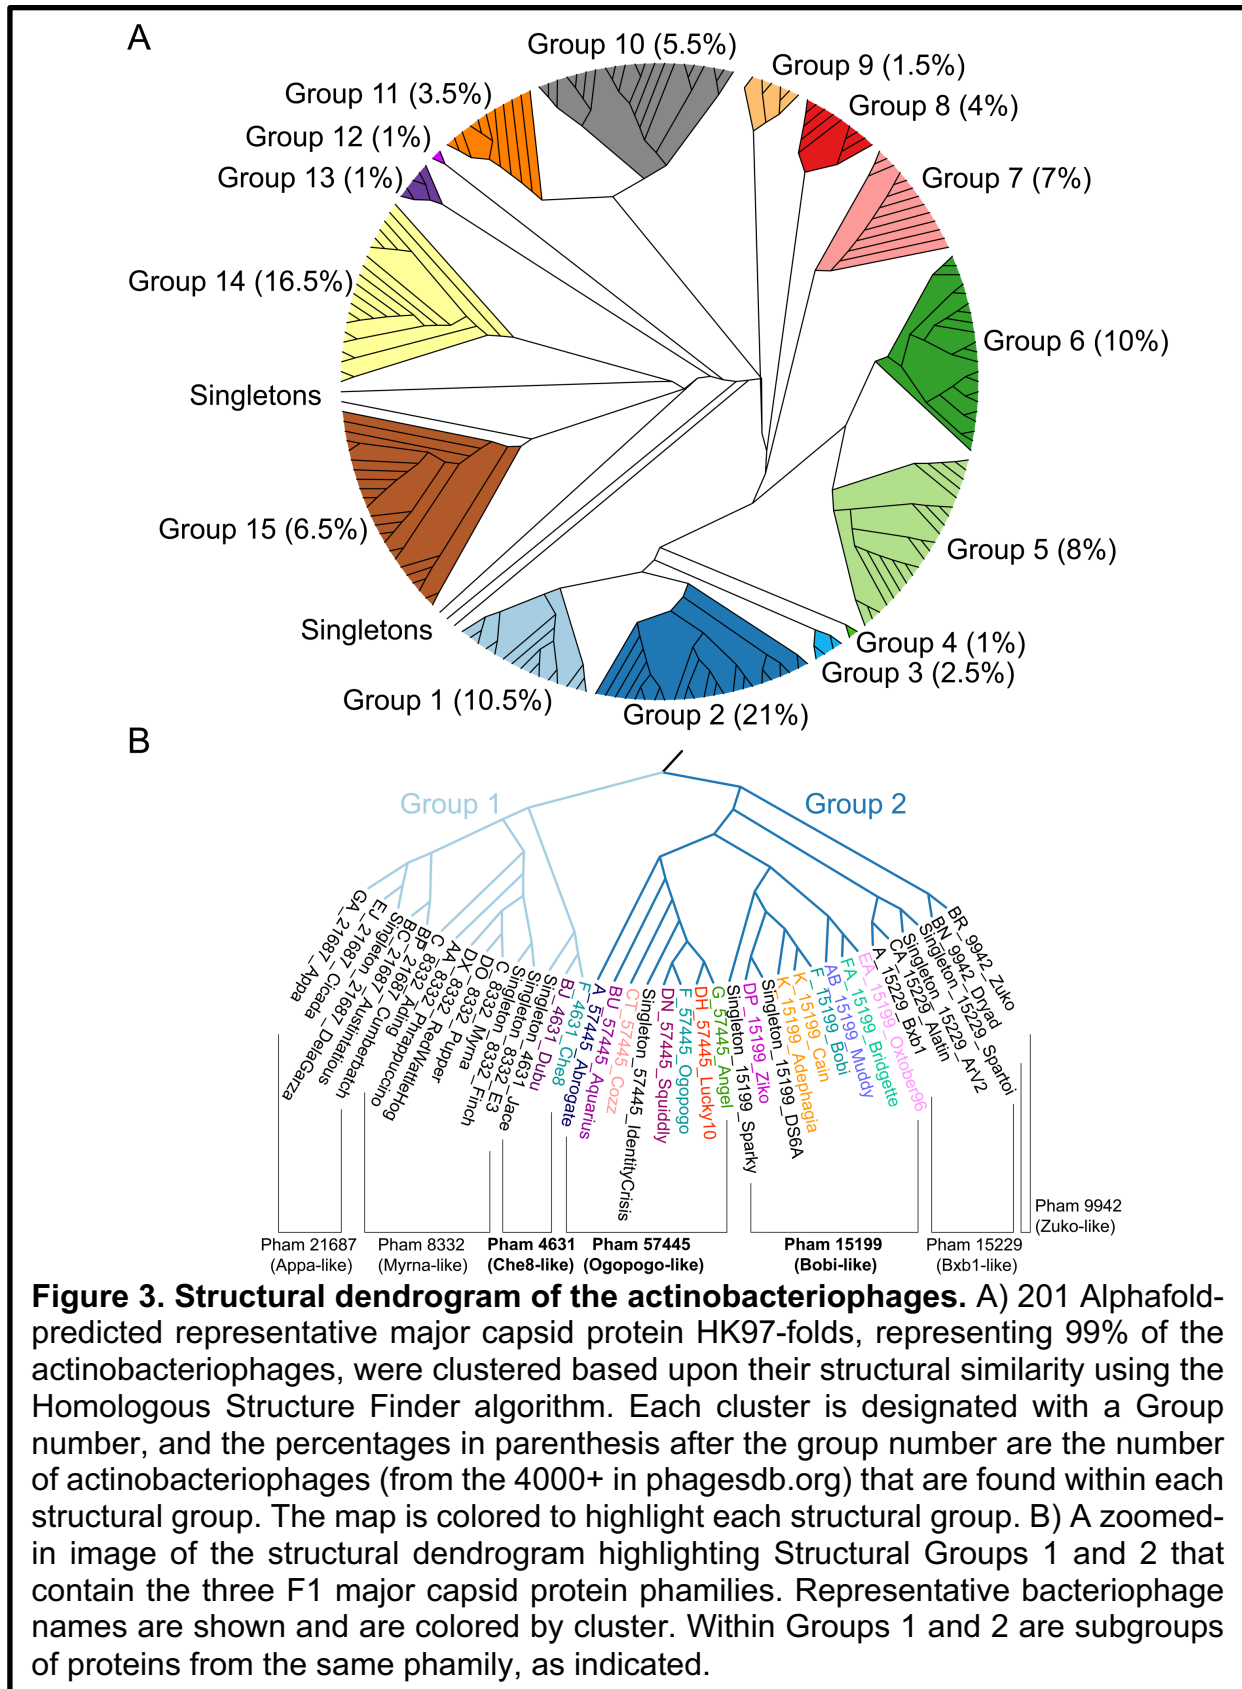

433 The structural map of the actinobacteriophages revealed that the 42 major capsid

434 protein families can be classified into 15 structural groups (Figure 3 A) that are likely  
435 to be evolutionarily related. Each structural group is classified solely on the three-  
436 dimensional structure of the major capsid protein and is independent of the cluster and  
437 major capsid protein family. Beyond the 15 structural groups are several “structural  
438 Singletons”. The structural dendrogram supports the initial structural comparison of the  
439 three Cluster F1 phage major capsid proteins in that the Che8-like family, sorted into  
440 Group 1, is more diverged from the Ogoogo and Bobi-like families found in Group 2  
441 (Figure 3 B). Both groups are relatively large and just over 30% of all the annotated  
442 actinobacteriophages use major capsid proteins found in these structural groups (Group  
443 1: 10.5% of all annotated actinobacteriophages and Group 2: 21%).

444

445 Group 1 (Supporting Figure 3) contains three different major capsid protein families:  
446 4631 (Che8-like), 8332 (Myrna-like), and 21687 (Appa-like). It is very similar to the  
447 HK97-fold of the HK97 virus, with RMSDs when compared to the HK97 major capsid  
448 protein of between 1 and 1.3 Å. However, all of the Group 1 major capsid proteins lack  
449 the G-loop of the spine helix. The Appa-like (21687) sub-group all have a 7-strand beta-  
450 sheet in the A domain, compared to the 5-strand sheet of the HK97-virus. The Appa-like  
451 members also have a large loop of varying length at the very end of the spine helix. The  
452 Myrna-like (pham 8332) sub-group all have a 6-strand beta sheet in the A domain. The  
453 Che8-like (pham 4631) sub-group all have the canonical five-strand beta sheet in the A  
454 domain but have an extra helix at the top of the A domain and an elongated spine helix  
455 with two extra turns when compared to the HK97 spine. All three structural sub-groups  
456 are defined by their major capsid protein family with no evidence of a member of a

457 phamily being more closely related to another phamily than its own phamily. For  
458 example, no Che8-like major capsid proteins cluster within the Appa-like or Myrna-like  
459 structural sub-groups.

460

461 Group 2 (Supporting Figure 4) contains four different major capsid protein phamilies:  
462 9942 (Zuko-like), 15229 (Bxb1-like), 15199 (Bobi-like), and 57445 (Ogopogo-like). The  
463 main architecture of the HK97-fold of Group 2 is once again highly similar to the HK97-  
464 fold of phage HK97, with an RMSD of between 1 and 1.4 Å. The main difference  
465 between Group 2 and HK97 is the presence of a larger G-loop within Group 2. The  
466 Ogopogo-like (57445) phages all have an elongated A<sub>3</sub>-loop within the A-domain  
467 directly above the G-loop and the A<sub>3</sub>-loop is predicted to interact with the G-loop via  
468 hydrogen bonding; this is confirmed by the cryo-EM-derived model of Ogopogo. The  
469 Bxb1-like (15229 sub-group) and Bobi-like (151999 sub-group) proteins contain an  
470 elongated P-loop in one of the beta-sheets of the P-domain. This loop is typically  
471 located at the 3-fold axis of the capsid and suggests that these phages have a raised  
472 “turret” at the three-fold. The “turret” can be seen in the cryo-EM maps of the Bobi-like  
473 (15229) capsids. The final sub-group, the Zuko-like (9942), are the most distantly  
474 related to the other three, although, like the Ogopogo-like sub-group, they have a similar  
475 extended A<sub>3</sub>-loop.

476

#### 477 ***The Bobi-like (15199) phamily can form differently-sized capsids***

478 Having characterized the three F1 phamilies and shown that Che8 is likely to be  
479 evolutionarily distinct from the other two phamilies, we next wanted to investigate how

480 the HK97-fold and capsid stability mechanisms are conserved within closely related  
481 phages. We chose to concentrate on the Group 2 phages since they use the protein  
482 “chainmail” found in HK97. Alignment of all the AlphaFold-predicted major capsid  
483 proteins from Group 2 shows lysine and aspartic acid/asparagine at the expected  
484 positions in the E-loop and P-domain in the majority of the Group 2 phages, apart from  
485 those in the Zuko-like (9942) sub-group and a subset of the Cluster K phages in the  
486 Bobi-like (15199) sub-group. Likewise, all the sub-groups, apart from the Zuko-like  
487 (9942) have a glutamic acid in a position within the P-domain that could act like the  
488 Glu363 in the HK97 major capsid protein for the catalysis of the cross-linking.

489

490 It was surprising to identify some of the K subcluster lacking the lysine residue needed  
491 for the isopeptide bond since all the other Bobi-like (15199) phages were predicted to  
492 use it. Removal of the isopeptide bond in HK97 by mutating the E-loop lysine to tyrosine  
493 results in non-viable phage particles indicating that the isopeptide bond is required<sup>74</sup> for  
494 infectious capsids to be made. The Bobi-like (15199) phages, therefore, provided an  
495 opportunity to characterize phage structures with and without the isopeptide bond and  
496 investigate how/and if the capsid compensates for its absence. We carried out cryo-EM  
497 on five other members of the Bobi-like (15199) phage capsids to yield density maps of <  
498 4 Å resolution (Supporting Table 2). We found that some of the Bobi-like (15199)  
499 phages formed T=9 capsids while others formed T=7 capsids (Figure 4). In each of the  
500 six phages (including Bobi), only the major capsid protein was identified in the cryo-EM  
501 map; no minor capsid proteins were observed. Bridgette of Cluster FA, however, did



502 have a decoration protein (Gp7, Supporting Figure 6) that bound as dimers around the  
503 5-fold axis of the pentamer, reminiscent of the phi29 phage spike proteins<sup>28</sup>.

504

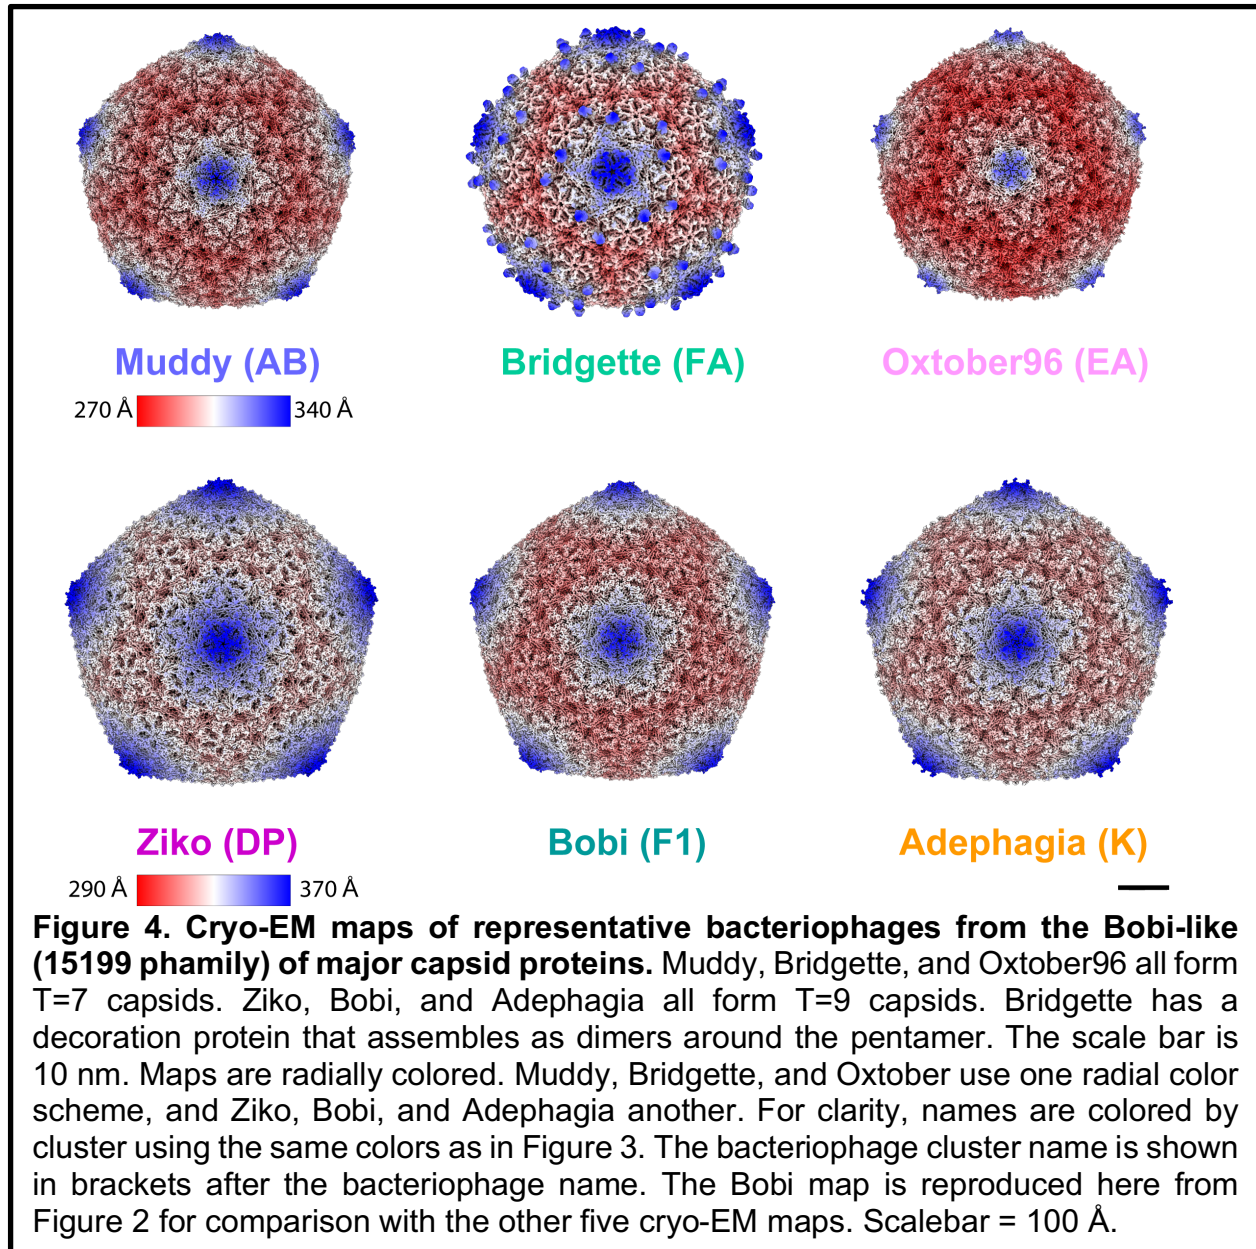

505

506

507 **The HK97-folds of the Bobi-like phamily (Pham 15199) are highly**  
508 **conserved, but exhibit structural diversity in the loop regions**  
509 The high resolution of the six maps of the representative Bobi-like (pham 15199)  
510 phages allowed for *de novo* model building of each of the major capsid proteins.  
511 Comparison of the HK97-folds showed very high similarity between them (Figure 5),  
512 with the highest RMSD value of 1.2 Å (Supporting Table 3). The protein fold is highly

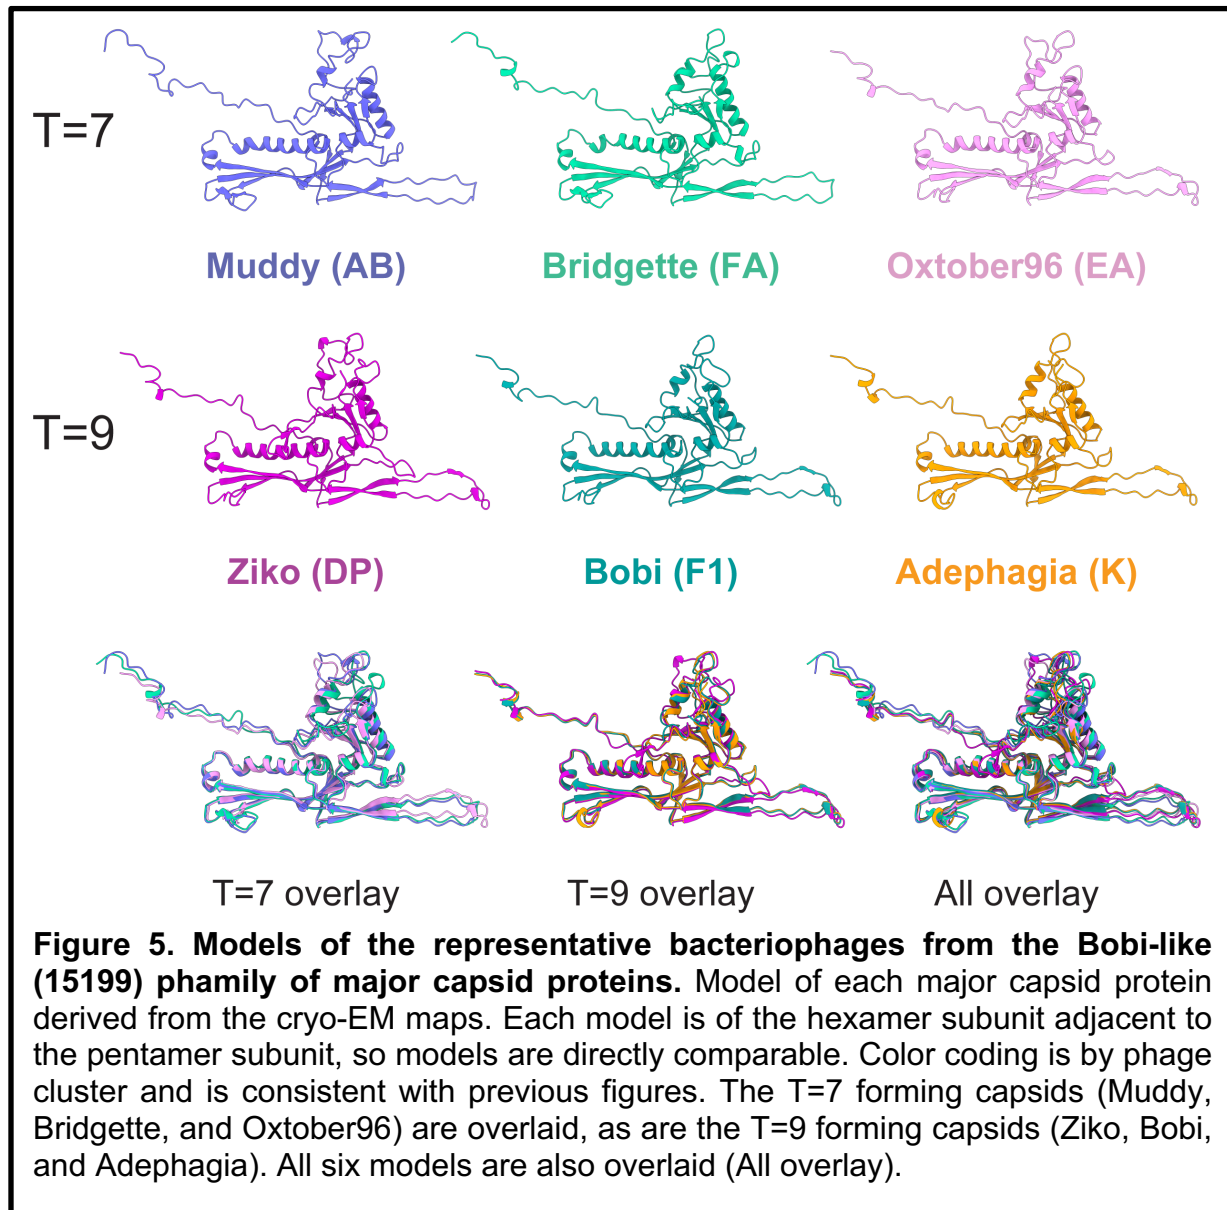

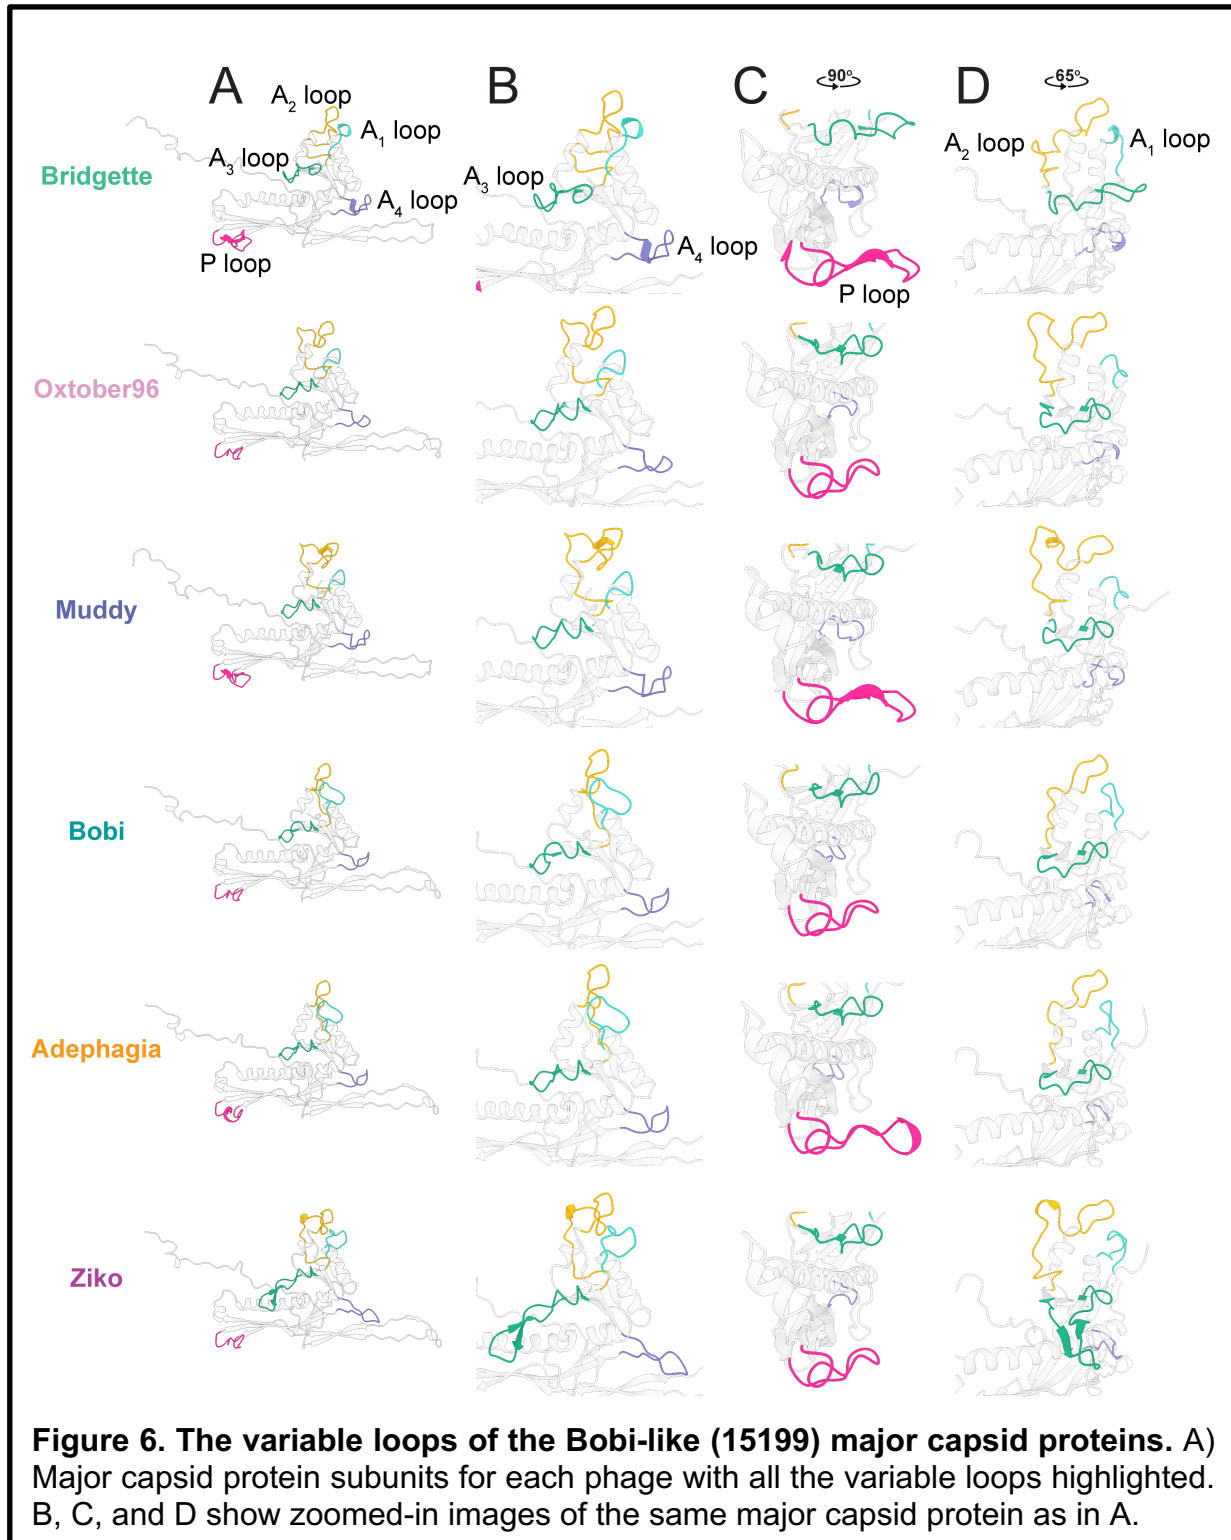

513 conserved and near identical, especially in the secondary structure alpha helices and  
514 beta sheets and can be overlaid without much deviation along the protein fold. It is

515 within five loop regions that the most structural diversity is observed (Figure 6). We  
516 have designated these loop regions A<sub>1</sub>-A<sub>4</sub> because of their position in the A domain, as  
517 well as the P-loop found in the P-domain. The A<sub>3</sub> and A<sub>4</sub> loops were first described in  
518 the HK97-fold of the phage T7 major capsid protein and named the A-loop (A<sub>3</sub> loop) and  
519 A-pocket (A<sub>4</sub> loop)<sup>26</sup>. We have renamed them here because of the extra loops we have  
520 identified. All the structurally characterized Bobi-like (pham 15199) phages have both A<sub>3</sub>  
521 and A<sub>4</sub> loops. Within Bobi, Oxtober96, and Adephagia, the two loops are of similar  
522 length and make intramolecular interactions but do not interact with one another. The  
523 other three phages, Bridgette, Muddy, and Ziko, all have increasingly long A<sub>3</sub> and A<sub>4</sub>  
524 loops, with those of Ziko being the longest (Figure 6 B). The extended A<sub>3</sub> loop in Ziko  
525 extends out over its G-loop, reminiscent of the same loop found in the Ogopogo-like  
526 phages (Figure 2 B). The G-loop stabilizes the Ziko A<sub>3</sub> loop with a salt bridge involving  
527 Gln130 in the G-loop and Asp223 in the A<sub>3</sub> loop. This is not observed in the Ogopogo-  
528 like phages where hydrogen bonds are used to stabilize the A<sub>3</sub> loop above the G-loop  
529 (Figure 2 B). The extended A<sub>3</sub> and A<sub>4</sub>-loops in Bridgette, Muddy, and Ziko stabilize the  
530 capsid through intermolecular interactions (Figure 7 A), either forming a single salt  
531 bridge (in the case of Bridgette) or a salt bridge combined with hydrogen bonds (in the  
532 case of Ziko) between the two loops on neighboring chains. Muddy does not make an  
533 intermolecular contact between the A<sub>3</sub> and A<sub>4</sub>-loops, instead, the A<sub>4</sub> loop forms a salt  
534 bridge with the N-arm of the adjacent major capsid protein. Only a single tryptophan  
535 (W224 in Bobi) is conserved in the A<sub>3</sub> loop across the Bobi-like (15199) major capsid  
536 proteins. It forms a pi-pi interaction with



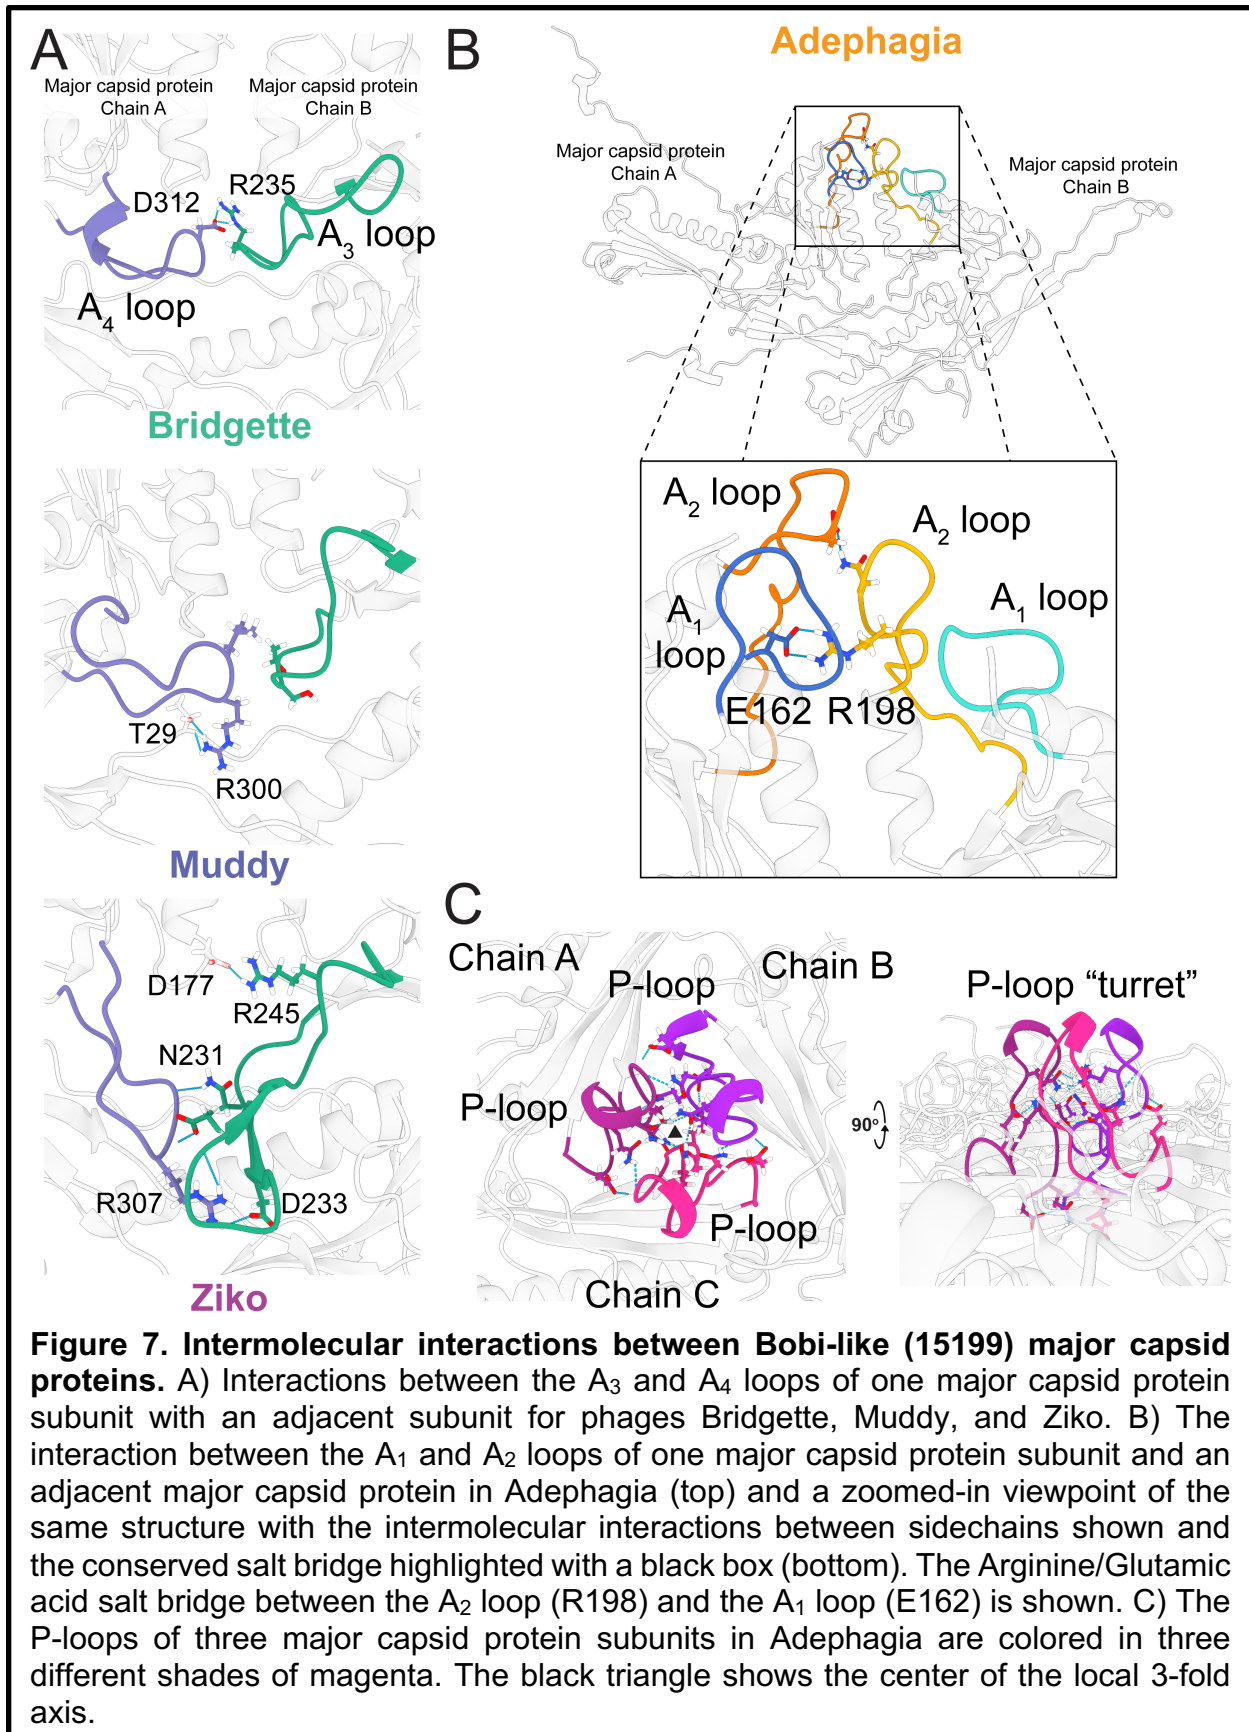

538 a conserved phenylalanine (Phe127 in Bobi) that presumably stabilizes the A<sub>3</sub> loop  
539 (Supporting Figure 6). No residues are conserved in the A<sub>4</sub> loop.

540

541 Extending this analysis to the wider Structural Group 2 (Figure 3) using the Alphafold  
542 predicted models (Supporting Figure 4) suggests that the two Singletons, DS6A and  
543 Sparky, both have elongated A<sub>3</sub> and A<sub>4</sub> loops like Ziko but the A<sub>3</sub> loop forms a beta  
544 hairpin structure. The A<sub>4</sub> loop is not universal amongst the Group 2 phages (Supporting  
545 Figure 4). For example, the Ogotogo-like (57445 phamily) and Bxb1-like (15229  
546 phamily) phages, completely lack the A<sub>4</sub> loop although they still have the A<sub>3</sub> loop.

547

548 The A<sub>1</sub> and A<sub>2</sub> loops are found at the top of the A domain (Figure 6 D), with the A<sub>2</sub> loop  
549 inserting into the center of the hexamer or pentamer capsomere. Oxtober96, Ziko, and  
550 Muddy all have elongated A<sub>2</sub> loops. A comparison of the A<sub>1</sub> and A<sub>2</sub> loops in the context  
551 of the capsid (Supporting Figure 7) shows that there is a conserved salt bridge between  
552 an Arginine in the A<sub>2</sub> loop of one major capsid protein and a Glutamic acid in the A<sub>1</sub> loop  
553 of an adjacent major capsid protein (Figure 7 B). However, in Bridgette, the salt bridge  
554 is between the two A<sub>2</sub> loops (Supporting Figure 7). The elongated A<sub>2</sub> loops do not  
555 appear to result in a consistent increase in intermolecular or intramolecular interactions  
556 between the major capsid proteins (Table 2) and no other amino acids are conserved.

557

**Table 2. Hydrogen bonds between the A<sub>1</sub> and A<sub>2</sub> loops.** Hydrogen bonds and salt bridges specific to the A<sub>1</sub> and A<sub>2</sub> loops were determined in ChimeraX<sup>49</sup>.

| <i>Bacteriophage name</i> | <i>Intermolecular bonds</i> | <i>Intramolecular bonds</i> |
|---------------------------|-----------------------------|-----------------------------|
| <i>Adephagia</i>          | 3                           | 32                          |
| <i>Bobi</i>               | 5                           | 32                          |
| <i>Ziko</i>               | 6                           | 31                          |
| <i>Muddy</i>              | 8                           | 24                          |
| <i>Oxtober96</i>          | 8                           | 25                          |
| <i>Bridgette</i>          | 4                           | 43                          |

558 The P-loop (Figure 6 C) makes contact with other P loops around the 3-fold axis,  
 559 creating small “turrets” that stick outward from the capsid (Figure 7 C). The P-loops  
 560 make several hydrogen bonds and salt bridges (Table 3) between adjacent P-loops that  
 561 are likely to play a role in the stabilization of the local 3-fold axis. Adephagia has one of  
 562 the longest P-loops and makes the most salt bridges and hydrogen bonds between the  
 563 P loops out of all six Bobi-like phages.

**Table 3. Hydrogen bonds in the local 3-fold axis.** Hydrogen bonds and salt bridges specific to the P-loop in a single local 3-fold axis were assessed in ChimeraX<sup>49</sup>. The number of bonds between all the major capsid proteins that are involved in the local 3-fold was determined using PDBsum<sup>64</sup>.

| <i>Bacteriophage name</i> | <i>P-loop hydrogen bonds</i> | <i>P-loop salt bridges</i> | <i>3-fold hydrogen bonds</i> | <i>3-fold salt bridges</i> |
|---------------------------|------------------------------|----------------------------|------------------------------|----------------------------|
| <i>Adephagia</i>          | 41                           | 9                          | 207                          | 73                         |
| <i>Bobi</i>               | 18                           | 3                          | 201                          | 90                         |
| <i>Ziko</i>               | 18                           | 3                          | 236                          | 89                         |
| <i>Muddy</i>              | 24                           | 0                          | 273                          | 65                         |
| <i>Oxtober96</i>          | 16                           | 0                          | 246                          | 108                        |
| <i>Bridgette</i>          | 19                           | 3                          | 198                          | 79                         |

564

565 The G-loop structure is well conserved across all of the Bobi-like (15199) phages and is  
566 a clear structural marker for this phamily of phage major capsid proteins despite only  
567 having a single conserved glycine and proline across the Bobi-like (15199) major capsid  
568 proteins (Supporting Figure 4).

569

570 ***Covalent crosslink residues are not found in all of the Bobi-like major capsid***  
571 ***proteins***

572 Alignment of the Bobi-like (15199) phamily major capsid protein amino acid sequences  
573 revealed that a subset of the Cluster K phages lack the lysine in the E-loop at position  
574 70 of the Bobi major capsid protein. This lysine, present in every other Bobi-like phamily  
575 member, as well as most of the Cluster K phages, is half of the amino acid pair that  
576 creates the isopeptide bond between two major capsid protein subunits. This lysine is  
577 substituted by isoleucine at position 70 (K70I, Figure 9 A) in 48% (78 in total) of the  
578 Cluster K phages, with the remaining Cluster K phages having the lysine at the correct  
579 position, demonstrating that it is not a rare occurrence. MAFFT alignment and  
580 phylogenetic analysis of the major capsid proteins showed that the Cluster K phages  
581 (Supporting Figure 8) are most closely related to the Cluster F phages (of which Bobi is  
582 the representative) with 70% amino acid sequence identity between Bobi and  
583 Adephagia (Clusters F and K, respectively). Within the K70I sub-group of Cluster K  
584 phages, there are nearby lysine residues that we hypothesize could act as the lysine for  
585 the isopeptide bond. Depending on the position of this misplaced lysine, these Cluster K  
586 phages can be divided into two groups (Figure 8 A). We have termed one group the



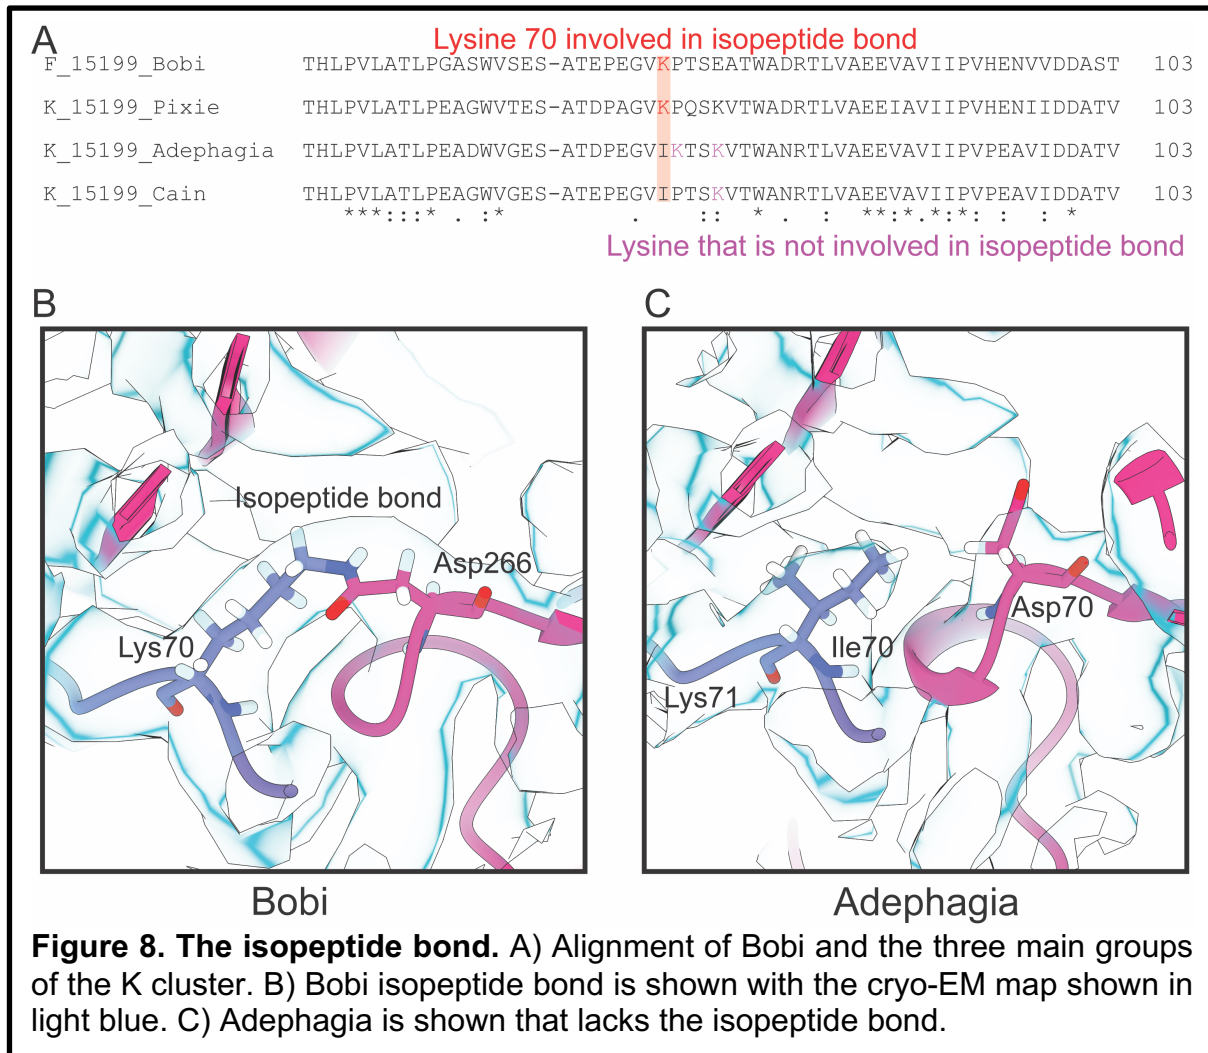

587 Adephagia-like phages, and the other the Cain-like phages. Both contain the isoleucine  
 588 replacement of the isopeptide-forming lysine. However, the Adephagia-like phages have  
 589 a lysine adjacent to the isoleucine, while the Cain-like phages have a lysine four  
 590 residues downstream (towards the C-terminus) from the isoleucine. The Cain-like  
 591 phages are a relatively small group, with only eight members (~5% of the Cluster K  
 592 phages). Overall, the major capsid proteins of Adephagia and Cain are highly similar to  
 593 the other Cluster K phages with an amino acid sequence identity of 92%. Having  
 594 already obtained a high-resolution map of Adephagia (Figure 5), we performed cryo-EM

595 on Cain and obtained a sub 3 Å map (Supporting Figure 9 A) to investigate whether it  
596 could form the isopeptide bond with the downstream lysine.

597

598 Analysis of the six cryo-EM maps from the Bobi-like (pham 15199) phages (Figure 4),  
599 as well as the map of the Cluster K Cain phage confirmed that all the phages, except  
600 Adephagia and Cain, had clear density for the isopeptide bond between the lysine in the  
601 E-loop and an aspartic acid in the P-domain of the adjacent major capsid protein (Figure  
602 8 B). The lysine residues within Adephagia and Cain that we hypothesized could form  
603 the isopeptide bond were therefore found not to be involved in covalent bond formation  
604 (Figure 8 C and Supporting Figure 9 B).

605

606 A consequence of the isopeptide bond is that all the major capsid proteins are  
607 covalently linked to one another, forming a large complexes. Previous SDS-PAGE  
608 analysis of the capsid of the HK97, where the isopeptide bond was first demonstrated  
609 (Figure 1), showed that the major capsid protein was unable to enter the gel due to its  
610 extensive crosslinking and large size<sup>75</sup>. We, therefore, ran the Ziko (that contains the  
611 isopeptide bond) and Adephagia (with no isopeptide bond) capsids on SDS-PAGE  
612 (Supporting Figure 10). The gel confirmed the cryo-EM analysis of isopeptide bond  
613 formation: no major capsid protein band was observed for Ziko at the expected  
614 molecular weight of 34 kDa but instead, there were dark areas at the top of the gel  
615 reminiscent of the HK97 SDS-PAGE analysis. Conversely, a large band consistent with  
616 the major capsid protein of Adephagia was detected on the gel at approximately 32 kDa  
617 (the predicted size of Adephagia gp13 major capsid protein is 32.7 kDa).

618 ***The isopeptide bond catalytic site in the Bobi-like phages is similar to that found***  
619 ***in HK97***

620 Phage HK97 was the first (and until now, only) structurally characterized example of the  
621 isopeptide bond in the tailed phages; the bond is formed between lysine 169 and  
622 asparagine 356 (Figure 1) and has been well characterized. The isopeptide bond has  
623 also been shown biochemically in other phages, for example, D3<sup>76</sup>, Q54<sup>77</sup>, and L5<sup>78</sup> but  
624 these have not been structurally characterized.

625

626 The formation of the isopeptide bond is catalyzed by a glutamic acid (Glu363 in HK97)  
627 located within a hydrophobic pocket made up of three amino acids (Val163, Met339,  
628 and Leu361)<sup>24</sup> (Figure 1). The Bobi-like isopeptide bond (Figure 8 B) is similar to that  
629 found in HK97; it is formed between lysine 70 in the E-loop and aspartic acid 266 in an  
630 adjacent major capsid protein subunit. A highly conserved glutamic acid (Glu86) and  
631 valine (Val59) are found in almost identical structural positions as those in HK97.

632 However, there are no equivalent hydrophobic residues in Bobi that would recapitulate  
633 the hydrophobic pocket provided by HK97 Met339 and Leu361, suggesting that these  
634 residues are not conserved across all phages that use the isopeptide bond and that  
635 different ways to create the hydrophobic pocket are possible. All the identified amino  
636 acids within the Bobi-like phage catalytic site are highly conserved across all of 15199  
637 pham apart from Lysine 70, which is substituted only in the aforementioned subset of  
638 the Cluster K phages: the Adephegia-like and Cain-like.

639

640 The catalytic glutamic acid is not structurally conserved across Group 2. In the Bobi-like  
641 (15199) sub-group the glutamic acid is structurally conserved (relative to HK97). In the  
642 same position within the other members of Group 2, all have a lysine at the same  
643 position. The Zuko-like (pham 9942) have no glutamic acid nearby that could play a  
644 catalytic role. The remaining members of Group 2 (Ogpogo-like and Bxb1-like) all have  
645 a structurally conserved glutamic acid nearby that could play a similar catalytic role. The  
646 position is confirmed in the cryo-EM map of Ogpogo with Glu290 in a position to  
647 possibly be the catalytic glutamic acid.

648

#### 649 ***Structural groups do not have a conserved hydrogen bond network***

650 The lack of an isopeptide bond in Adephagia and the other Cluster K phages raised the  
651 question as to how they compensate for the absence of the covalent isopeptide bond  
652 around the local 3-fold axis for capsid stability. Removal of the isopeptide bond in HK97  
653 results in unviable capsids, suggesting it is critical for the survival of virion. With no  
654 minor capsid protein or other accessory protein to compensate for the loss of the  
655 isopeptide bond, we examined the hydrogen bonds and salt bridges around the local 3-  
656 fold axis, hypothesizing that there would be an increased number of such interactions  
657 around the local 3-fold of Adephagia when compared to Bobi, its closest relative in the  
658 Bobi-like (15199) pham. Specifically, we predicted that the P-loops at the center of the  
659 3-fold would have increased interactions in Adephagia. Indeed, this is what we  
660 observed, with an increase in both salt bridges and hydrogen bonds between the P-  
661 loops, with Adephagia having three times the salt bridges and double the number of  
662 hydrogen bonds when compared to Bobi (Table 3). This equates to an increase of 240

663 kJ/mol free energy between Adephagia and Bobi at the site of the P-loops, although this  
664 must be contrasted with a loss of 1068 kJ/mol in free energy because of the removal of  
665 the isopeptide bonds. However, despite the increase in interactions at the P-loop, which  
666 is located at the center of the local 3-fold axis, there was no increase in the number of  
667 hydrogen bonds and salt bridges between Adephagia and Bobi around the wider local  
668 3-fold axis that takes into account all nine interacting major capsid proteins (Table 3 and  
669 Supporting Figure 11). We next expanded the analysis to the other members of the  
670 Bobi-like (15199) pham, which revealed that all the capsids had similar numbers of  
671 hydrogen bonds and salt bridges around the local 3-fold axis but only a handful of these  
672 were structurally conserved, with different distribution patterns of the interactions for  
673 each phage (Table 3 and Supporting Figure 11). We, therefore, conclude that extra  
674 stabilization around the local 3-fold axis is not required to compensate for the missing  
675 isopeptide bond in Cain-like and Adephagia-like capsids.

676

677 We next hypothesized that the handful of conserved amino acids found in the Bobi-like  
678 (15199) phages that were involved in capsid stability would be conserved across all of  
679 Structural Group 2; these phages all had very similar major capsid protein HK97-folds  
680 and we predicted they would use similar mechanisms to maintain the stability of the  
681 capsid around the local 3-fold. However, analysis of the amino acid sequences of the  
682 major capsid proteins of Structural Group 2 revealed almost no conserved amino acid  
683 sequence identify. A single conserved aspartic acid (D122 in Bobi) is found in all of  
684 Structural Group 2, located at the top of the spine helix (C-terminal end). In Bobi (and  
685 the other Bobi-like phages that we structurally characterized) this aspartic acid makes a

686 hydrogen bond with the N-arm of the same major capsid protein chain. The hydrogen  
687 bond donor amino acid in Bobi is serine (S29), which is common across the majority of  
688 Structural Group 2. Some lack the serine and have either lysine or alanine in its place.  
689 Ziko is one such phage, which has a lysine at the equivalent position. In Ziko, the  
690 conserved aspartic acid interacts with the protein backbone of the lysine in the N-arm in  
691 a structurally equivalent position to serine 29 in Bobi.

692

693 Due to the lack of amino acid sequence identity, we turned to the models we had  
694 derived from the cryo-EM maps of the phages. We examined the structurally conserved  
695 interactions across Structural Group 2, once again hypothesizing that the most critical of  
696 these interactions would be conserved. We overlaid the local 3-fold axis of all six of the  
697 Bobi-like (pham 15199) phages and Ogotogo (pham 57445). To better represent more  
698 members of Structural Group 2 in this analysis we also included Cozz, a close relative  
699 of Ogotogo and also part of the 57445 pham (Supporting Figure 11). Cozz was  
700 subjected to cryo-EM analysis and a sub-3 Å resolution map was obtained that allowed  
701 for *de novo* model building. This structural comparison showed that there were no salt  
702 bridges conserved between the different phages in Structural Group 2, nor was there a  
703 conserved hydrogen bond network. Each phage used a different pattern of bond  
704 formation between the major capsid proteins for intermolecular stability. We, therefore,  
705 conclude that what unifies a Structural Group is the capsid configuration and that the  
706 phages have evolved different bond networks to achieve the same final product.

707

708

709 **Discussion**

710

711 ***Capsid stability***

712 Tailed phages have been found in a wide range of environmental habitats, ranging from  
713 relatively benign soil to hot springs and stomach acid<sup>27</sup>. In addition to these harsh  
714 external environments, the capsid is also under stress from the inside: the predicted  
715 pressure that the packaged dsDNA exerts on the inside of the capsid has been  
716 estimated at 30 atmospheres<sup>79</sup>. The phage capsid must be stable enough to survive  
717 these two main stresses. Many stabilization mechanisms have been characterized at  
718 the local three-fold axis of the capsid, implying they play an important role. These  
719 typically include many inter-capsomer interactions, for example, the interaction of the P-  
720 domains around the three-fold axis of the capsid; the N-arm reaching across to make  
721 contacts with adjacent major capsid proteins, and the E-loop interacting with the P-  
722 domain. Only HK97 has had its isopeptide bond structurally characterized, although  
723 phages have been shown to use the isopeptide bond biochemically. Since then, each  
724 structurally characterized phage has been found to lack the isopeptide bond but uses  
725 alternate mechanisms to compensate for the lack of this bond to stabilize the local  
726 three-fold axis. These include extra domains in the HK97-fold, for example, the I  
727 domains found in P22<sup>39</sup> and T4<sup>48</sup>, that have been shown to play a role in capsid  
728 stability<sup>80</sup>. Additional capsid proteins have also been characterized that are thought to  
729 play a role in stability. This includes minor capsid proteins/cement proteins found in  
730 several tailed phages and which form trimers/dimers throughout the capsid between the  
731 hexamers and pentamers. Other proteins, called decoration or ancillary proteins, have



732 also been characterized that may be involved in stability, although in many cases they  
733 are not vital for capsid viability (for example, the soc protein of T4<sup>81</sup>). Finally, more  
734 diverse mechanisms have been characterized such as the lasso-like interactions in the  
735 E-loop observed in two phages isolated in hot springs<sup>40,41</sup>.

736

737 However, some phages, for example, T7<sup>26</sup> and the recently structurally characterized  
738 phage phiRSA1<sup>27</sup>, show that some phages rely solely on the electrostatic and  
739 hydrophobic interactions between the major capsid proteins<sup>27</sup>. Here, we have described  
740 a similar lack of stabilizing mechanisms in the T=9 actinobacteriophage Che8, which is  
741 an even more simplified example of the HK97-fold than phiRSA1; Che8 lacks the  
742 isopeptide bond and any other previously characterized capsid stabilizing interactions,  
743 instead relying on only a handful of protein: protein interactions between the major  
744 capsid proteins that are found in every HK97-fold major capsid protein. The Che8 major  
745 capsid protein also lacks the G-loop, which has been shown to play an important role in  
746 capsid assembly<sup>82</sup>. Furthermore, it lacks any potential loop that could compensate for  
747 the G-loop, demonstrating that the roles of the G-loop in the HK97 capsid are not  
748 required across all other HK97-folds. Additionally, Che8 has no minor capsid proteins,  
749 decoration proteins, or I-loops/other extended loops or embellishments that may  
750 contribute to capsid stability. This suggests that the core HK97-fold is all that is needed  
751 for capsid stabilization and that Che8 is likely to be more similar to the earliest HK97-  
752 fold. This is further supported by the Structural Group 9 phages that all have relatively  
753 small genomes (< 30 kbp) and are predicted to form T=4 or smaller capsids  
754 (unpublished data). All of these phages lack a G-loop and are similar in structure to the



755 Che8 HK97-fold with a long spine helix. This leads us to speculate that the earliest  
756 common ancestor to these phages lacked the G-loop. It also suggests different  
757 assembly mechanisms between the different HK97-folds since the G-loop in HK97 was  
758 shown to play an important role in assembly and mutations in the G-loop led to the  
759 formation of aberrant particles<sup>82</sup>.

760

761 The isopeptide bond is a covalent bond between two neighboring major capsid protein  
762 subunits and is critical to the viability of HK97 virions. Here, we have structurally  
763 characterized other tailed phages that also use the isopeptide bond in their capsid. The  
764 Bobi-like (pham 15199) phages all use the same isopeptide bond as in HK97, although  
765 they substitute asparagine for aspartate in the P-domain to create the bond. The use of  
766 an aspartic acid to form the isopeptide bond has not been observed in the tailed phages  
767 before but has been characterized in bacterial proteins<sup>83</sup>. Also, the mechanism by which  
768 the isopeptide is formed may be subtly different. The catalytic glutamic acid residue is  
769 still present in the Bobi-like phages, but they lack two of the residues known to form the  
770 hydrophobic pocket that is important for the catalysis of the bond<sup>24</sup>. There are no  
771 obvious analogs in the Bobi-like phages for those two residues, and these phages may  
772 create the hydrophobic pocket through other means. However, not all of the Bobi-like  
773 phages use the isopeptide bond; a small subset of the Cluster K phages, which we term  
774 the Adephagia and Cain-like phages, do not use the isopeptide bond and the lysine in  
775 the E-loop is substituted with isoleucine. This resulting residue chemistry prevents the  
776 formation of an isopeptide bond. Phylogenetic analysis of the Bobi-like phages  
777 (Supporting Figure 8) suggests that the Cluster K phages diverged from within the Bobi-

778 like phamily. Although this is speculative, it does support the model that the Adephagia-  
779 like and Cain-like phages had the isopeptide bond at some point before it was lost, as  
780 opposed to being an intermediate between non-isopeptide bond phages that then  
781 evolved to have the isopeptide bond. This is further supported by the other Cluster K  
782 phages having the correct lysine for isopeptide formation and presumably forming that  
783 isopeptide bond. We were unable to identify any unique increase in inter-capsid  
784 interactions in the Adephagia- and Cain-like phages that would compensate for the loss  
785 of the isopeptide bond. This suggests that, at least in the Bobi-like phages, the  
786 isopeptide bond is not critical to the viability of the phage capsid and that compensatory  
787 mechanisms, for example, minor capsid proteins, are not needed. This raises the  
788 question as to the role of the isopeptide bond, and why some phages do not require the  
789 extra stabilization it affords. A potential explanation is that Cain- and Adephagia-like  
790 phages package less dsDNA, exerting less internal pressure on the capsid than those  
791 that use the isopeptide bond. However, this correlation cannot yet be made as the  
792 amount of dsDNA packaged has not been measured, although we observe that both  
793 phages have cos-type genome ends that typically means that the DNA packaged is the  
794 same as the genome length.

795

### 796 ***Capsid size***

797 The tailed phages make protein shells of variable sizes. The smallest to date are the  
798 T=4 capsids of P68<sup>30</sup> and the T=3 prolate phi29<sup>28</sup>. The majority are predicted to be T=7,  
799 although many “jumbo” phages have been characterized with very large T numbers<sup>32</sup>.  
800 How capsid size is controlled is still an open question. However, many major capsid

801 protein mutants that change the size of the final capsid have been identified in the  
802 model phages P22 and T4. The major capsid protein mutants in P22, where the capsid  
803 protein is referred to as the coat protein, all result in the wild-type T=7 capsid with the  
804 ability of also creating smaller T=4 capsids or aberrant particles<sup>84</sup>. Within the prolate  
805 phage T4, the mutants result in “giant” capsids that have lost the ability to regulate the  
806 length of the prolate caps and form very long prolate heads<sup>85</sup>. The work on  
807 *Staphylococcus aureus* infecting phages and the mechanisms that this bacterium uses  
808 to co-opt the phage capsids for the use of the bacteria all result in smaller capsids<sup>45,34</sup>.  
809 Here we have identified several closely related phages that use related major capsid  
810 proteins from that same protein phamily, but make either T=7 or T=9 capsids. There are  
811 no obvious differences in structure or amino acid conservation between these T=9 and  
812 T=7 phage capsids (from phamily 15199) that explains the difference in size. The T=7  
813 capsids use a different phamily of scaffold proteins than the T=9. supporting the role of  
814 the different scaffolding proteins as the main mechanism of capsid size determination.  
815 However, further work is needed to characterize the mechanisms by which these  
816 phages assemble. The actinobacteriophages are a rich resource for these types of  
817 studies. For example, the structural Group 1 phages contain both Che8 (a T=9 capsid)  
818 and Myrna, a T=16 capsid that uses minor capsid proteins<sup>51</sup>. Further study of the Group  
819 1 phages could provide important insights into how minor capsid proteins are first  
820 incorporated into the capsid and how larger capsids evolve.

821

822

823

824 ***The evolution of the major capsid proteins of the actinobacteriophages***

825 We have reported here the first systematic structural study of a group of phages that  
826 infect hosts from a single phylum of bacteria. The actinobacteriophages infect hosts  
827 from an important bacterial phylum, with *Mycobacterium tuberculosis* a major health  
828 concern around the world and non-tuberculosis mycobacteria a major source of lung  
829 disease. Most phages are specific to a single host, although some can infect and  
830 replicate within many species of the same phylum. There are likely several reasons for  
831 the limited host range, including specificity of host binding proteins in phages, codon  
832 usage, differences in cellular machinery, and presence of phage-resistance  
833 mechanisms<sup>86</sup>. Phages are very likely to be limited to a specific phylum and to our  
834 knowledge presently there are no examples of phages that infect hosts in multiple  
835 bacterial phyla. The Actinobacteria are an ancient bacterial phylum and are estimated to  
836 have diverged from the Proteobacteria phylum over 3 billion years ago<sup>87</sup>. The majority of  
837 the well-characterized model system phages infect hosts in the Proteobacteria phylum,  
838 for example, P22 that infects *Salmonella* and T4 that infects *E.coli*, and most of the  
839 structures of tailed phages come from the Proteobacteria. The temporal distance  
840 between the Actinobacteria and Proteobacteria phyla, as well as the lack of evidence of  
841 phages moving between phyla, would suggest that the phages that replicate in the two  
842 phyla should also be temporally distant and that major capsid proteins will have had  
843 different evolutionary pathways. However, the structural analysis of the  
844 actinobacteriophages does provide evidence that these phages are ancient. The  
845 isopeptide bond in the Bobi-like phages provides some evidence that these HK97-folds  
846 predate the divergence of the Proteobacteria and Actinobacteria. Interestingly, it

847 appears that structurally-related major capsid proteins can be found in different capsid  
848 morphologies. For example, Structural Group 1 from the actinobacteriophage structural  
849 dendrogram contains both the *Siphoviridae* Che8 and *Myoviridae* Myrna, both of which  
850 we have structurally characterized in this paper and previously<sup>51</sup>. How these two  
851 morphologies ended up using the same major capsid protein is intriguing, and additional  
852 characterization of Group 1 is needed to explore this further. Is there a T=9 *Myoviridae*  
853 in Group 1 that has the same capsid protein structure as Che8? We expect that further  
854 research into the different structural groups will provide a deeper insight into the  
855 evolutionary relationship between tailed phages.

## 856 **Acknowledgments**

857

858 We thank Dr. Gabrielle Valles for a helpful review of the paper. We acknowledge the  
859 hard work and dedication of all those involved (those at the University of Pittsburgh and  
860 HHMI) in the creation and continued support of the SEA-PHAGES program.

861 Specifically, we thank the following students from the SEA-PHAGES program for the  
862 isolation of each phage:

863

864 Bridgette: Kira Zack and others at the University of Pittsburgh, PHIRE Program

865 Muddy: Lilli Hoist and others at the University of Kwazulu-Natal, PHIRE Program

866 Oxtober96: Lijia Xin and others at the University of Connecticut, SEA-PHAGES

867 Program

868 Ziko: Anna Bondonese and others at the University of Pittsburgh, SEA-PHAGES

869 Program

870 Bobi: Margaret Korty and Stephanie Maas and others at Purdue University, SEA-

871 PHAGES Program

872 Adephagia: Jordan L. Mosier and others at the University of North Texas, SEA-

873 PHAGES Program

874 Cain: Thomas Cast and Kara Gallo and others at Gonzaga University, SEA-PHAGES

875 Program

876 Che8: V. Kumar and others at the Albert Einstein College of Medicine

877 Ogotogo: Kaylee Nicholson and others at the University of California, Santa Cruz, SEA-

878 PHAGES Program

879 Cozz: Matthew Montgomery and others at the University of Pittsburgh, PHIRE Program

880

881 We also want to thank the myriad of students and faculty who have contributed to the

882 201 phages we included in our bioinformatic analyses.

883

884 A portion of this research was supported by NIH grant U24GM129547 and performed at

885 the PNCC at OHSU and accessed through EMSL (grid.436923.9), a DOE Office of

886 Science User Facility sponsored by the Office of Biological and Environmental  
887 Research.

888

889 This work was supported by National Institutes of Health grants GM131729 and Howard  
890 Hughes Medical Institute grants GT12053 (to GFH). The University of Pittsburgh Titan  
891 Krios microscope and Falcon 3 camera were supported by the Office of the Director,  
892 National Institutes of Health, under award numbers S10 OD025009 and S10  
893 OD019995, respectively (JFC).

894

895 We also thank the following scientists at PNCC for the data collection: Theo  
896 Humphreys, Omar Davulcu, Nancy Meyer, and Rose Marie Haynes.

897

898 **Competing Interests:** G.F.H. is a compensated consultant for Tessera and for Janssen  
899 Inc. The remaining authors declare no competing interests.

## 900 **References**

- 901 1. Helgstrand, C. *et al.* The Refined Structure of a Protein Catenane: The HK97 Bacteriophage  
902 Capsid at 3.44Å Resolution. *Journal of Molecular Biology* **334**, 885–899 (2003).
- 903 2. Pietilä, M. K. *et al.* Structure of the archaeal head-tailed virus HSTV-1 completes the HK97  
904 fold story. *Proc Natl Acad Sci U S A* **110**, 10604–10609 (2013).
- 905 3. Dai, X. & Zhou, Z. H. Structure of the herpes simplex virus 1 capsid with associated  
906 tegument protein complexes. *Science* **360**, eaao7298 (2018).
- 907 4. Sutter, M. *et al.* Structural basis of enzyme encapsulation into a bacterial  
908 nanocompartment. *Nat. Struct. Mol. Biol.* **15**, 939–947 (2008).
- 909 5. Nichols, R. J., Cassidy-Amstutz, C., Chaijarasphong, T. & Savage, D. F. Encapsulins: molecular  
910 biology of the shell. *Critical Reviews in Biochemistry and Molecular Biology* **52**, 583–594  
911 (2017).
- 912 6. Suttle, C. A. Marine viruses — major players in the global ecosystem. *Nat Rev Microbiol* **5**,  
913 801–812 (2007).
- 914 7. Jordan, T. C. *et al.* A Broadly Implementable Research Course in Phage Discovery and  
915 Genomics for First-Year Undergraduate Students. *mBio* **5**, e01051-13.
- 916 8. Teaching Scientific Inquiry. <https://www.science.org/doi/10.1126/science.1136796>.
- 917 9. Hatfull, G. F. Actinobacteriophages: Genomics, Dynamics, and Applications. *Annual Review*  
918 *of Virology* **7**, 37–61 (2020).
- 919 10. Dedrick, R. M. *et al.* Engineered bacteriophages for treatment of a patient with a  
920 disseminated drug-resistant *Mycobacterium abscessus*. *Nat Med* **25**, 730–733 (2019).



- 921 11. Diacon, A. H. *et al.* Mycobacteriophages to Treat Tuberculosis: Dream or Delusion?  
922 *Respiration* **101**, 1–15 (2022).
- 923 12. Duda, R. L. & Teschke, C. M. The amazing HK97 fold: versatile results of modest differences.  
924 *Current Opinion in Virology* **36**, 9–16 (2019).
- 925 13. Suhanovsky, M. M. & Teschke, C. M. Nature’s favorite building block: Deciphering folding  
926 and capsid assembly of proteins with the HK97-fold. *Virology* **479–480**, 487–497 (2015).
- 927 14. Zhou, Z. H. & Chiou, J. Protein chainmail variants in dsDNA viruses. *AIMS Biophys* **2**, 200–  
928 218 (2015).
- 929 15. Caspar, D. L. & Klug, A. Physical principles in the construction of regular viruses. *Cold Spring*  
930 *Harb. Symp. Quant. Biol.* **27**, 1–24 (1962).
- 931 16. Gertsman, I., Fu, C.-Y., Huang, R., Komives, E. A. & Johnson, J. E. Critical Salt Bridges Guide  
932 Capsid Assembly, Stability, and Maturation Behavior in Bacteriophage HK97. *Mol Cell*  
933 *Proteomics* **9**, 1752–1763 (2010).
- 934 17. Evilevitch, A. *et al.* Effects of Salt Concentrations and Bending Energy on the Extent of  
935 Ejection of Phage Genomes. *Biophysical Journal* **94**, 1110–1120 (2008).
- 936 18. São-José, C., de Frutos, M., Raspaud, E., Santos, M. A. & Tavares, P. Pressure Built by DNA  
937 Packing Inside Virions: Enough to Drive DNA Ejection in Vitro, Largely Insufficient for  
938 Delivery into the Bacterial Cytoplasm. *Journal of Molecular Biology* **374**, 346–355 (2007).
- 939 19. Kindt, J., Tzlil, S., Ben-Shaul, A. & Gelbart, W. M. DNA packaging and ejection forces in  
940 bacteriophage. *PNAS* **98**, 13671–13674 (2001).

- 941 20. Lander, G. C. *et al.* Bacteriophage lambda stabilization by auxiliary protein gpD: timing,  
942 location, and mechanism of attachment determined by cryoEM. *Structure* **16**, 1399–1406  
943 (2008).
- 944 21. Wang, C., Zeng, J. & Wang, J. Structural basis of bacteriophage lambda capsid maturation.  
945 *Structure* (2022) doi:10.1016/j.str.2021.12.009.
- 946 22. Zhang, X. *et al.* A new topology of the HK97-like fold revealed in Bordetella bacteriophage  
947 by cryoEM at 3.5 Å resolution. *eLife* **2**, e01299 (2013).
- 948 23. Wikoff, W. R. *et al.* Topologically Linked Protein Rings in the Bacteriophage HK97 Capsid.  
949 *Science* **289**, 2129–2133 (2000).
- 950 24. Tso, D., Peebles, C. L., Maurer, J. B., Duda, R. L. & Hendrix, R. W. On the catalytic mechanism  
951 of bacteriophage HK97 capsid crosslinking. *Virology* **506**, 84–91 (2017).
- 952 25. Huet, A., Duda, R. L., Boulanger, P. & Conway, J. F. Capsid expansion of bacteriophage T5  
953 revealed by high resolution cryoelectron microscopy. *PNAS* **116**, 21037–21046 (2019).
- 954 26. Guo, F. *et al.* Capsid expansion mechanism of bacteriophage T7 revealed by multistate  
955 atomic models derived from cryo-EM reconstructions. *PNAS* **111**, E4606–E4614 (2014).
- 956 27. Effantin, G., Fujiwara, A., Kawasaki, T., Yamada, T. & Schoehn, G. High Resolution Structure  
957 of the Mature Capsid of Ralstonia solanacearum Bacteriophage φRSA1 by Cryo-Electron  
958 Microscopy. *Int J Mol Sci* **22**, 11053 (2021).
- 959 28. Xu, J., Wang, D., Gui, M. & Xiang, Y. Structural assembly of the tailed bacteriophage φ29.  
960 *Nat Commun* **10**, 2366 (2019).

- 961 29. Aksyuk, A. A. *et al.* Structural investigations of a Podoviridae streptococcus phage C1,  
962 implications for the mechanism of viral entry. *Proc Natl Acad Sci U S A* **109**, 14001–14006  
963 (2012).
- 964 30. Hrebík, D. *et al.* Structure and genome ejection mechanism of Staphylococcus aureus phage  
965 P68. *Science Advances* **5**, eaaw7414 (2019).
- 966 31. Gonzalez, B. *et al.* Phage G structure at 6.1 Å resolution, condensed DNA, and host identity  
967 revision to a Lysinibacillus. *J Mol Biol* **432**, 4139–4153 (2020).
- 968 32. Hua, J. *et al.* Capsids and Genomes of Jumbo-Sized Bacteriophages Reveal the Evolutionary  
969 Reach of the HK97 Fold. *mBio* **8**, (2017).
- 970 33. Nováček, J. *et al.* Structure and genome release of Twort-like Myoviridae phage with a  
971 double-layered baseplate. *Proc Natl Acad Sci USA* **113**, 9351–9356 (2016).
- 972 34. Dearborn, A. D. *et al.* Competing scaffolding proteins determine capsid size during  
973 mobilization of Staphylococcus aureus pathogenicity islands. *eLife* **6**, e30822 (2017).
- 974 35. Cui, N. *et al.* Capsid Structure of Anabaena Cyanophage A-1(L). *Journal of Virology* **95**,  
975 e01356-21.
- 976 36. Baker, M. L. *et al.* Validated near-atomic resolution structure of bacteriophage epsilon15  
977 derived from cryo-EM and modeling. *PNAS* **110**, 12301–12306 (2013).
- 978 37. Kamiya, R. *et al.* Acid-stable capsid structure of Helicobacter pylori bacteriophage KHP30 by  
979 single-particle cryoelectron microscopy. *Structure* (2021) doi:10.1016/j.str.2021.09.001.
- 980 38. Jin, H. *et al.* Capsid Structure of a Freshwater Cyanophage Siphoviridae Mic1. *Structure* **27**,  
981 1508-1516.e3 (2019).

- 982 39. Hryc, C. F. *et al.* Accurate model annotation of a near-atomic resolution cryo-EM map. *PNAS*  
983 **114**, 3103–3108 (2017).
- 984 40. Bayfield, O. W. *et al.* Cryo-EM structure and in vitro DNA packaging of a thermophilic virus  
985 with supersized T=7 capsids. *PNAS* **116**, 3556–3561 (2019).
- 986 41. Stone, N. P., Demo, G., Agnello, E. & Kelch, B. A. Principles for enhancing virus capsid  
987 capacity and stability from a thermophilic virus capsid structure. *Nat Commun* **10**, 4471  
988 (2019).
- 989 42. Johnson, M. C. *et al.* Structure, proteome and genome of Sinorhizobium meliloti phage  
990 ΦM5: A virus with LUZ24-like morphology and a highly mosaic genome. *Journal of*  
991 *Structural Biology* **200**, 343–359 (2017).
- 992 43. Liu, X. *et al.* Structural changes in a marine podovirus associated with release of its genome  
993 into Prochlorococcus. *Nat Struct Mol Biol* **17**, 830–836 (2010).
- 994 44. Bárdy, P. *et al.* Structure and mechanism of DNA delivery of a gene transfer agent. *Nat*  
995 *Commun* **11**, 3034 (2020).
- 996 45. Hawkins, N. C., Kizziah, J. L., Penadés, J. R. & Dokland, T. Shape shifter: redirection of  
997 prolate phage capsid assembly by staphylococcal pathogenicity islands. *Nat Commun* **12**,  
998 6408 (2021).
- 999 46. Zhao, H. *et al.* Structure of a headful DNA-packaging bacterial virus at 2.9 Å resolution by  
1000 electron cryo-microscopy. *PNAS* **114**, 3601–3606 (2017).
- 1001 47. Gipson, P. *et al.* Protruding knob-like proteins violate local symmetries in an icosahedral  
1002 marine virus. *Nat Commun* **5**, 4278 (2014).

- 1003 48. Chen, Z. *et al.* Cryo-EM structure of the bacteriophage T4 isometric head at 3.3-Å resolution  
1004 and its relevance to the assembly of icosahedral viruses. *PNAS* **114**, E8184–E8193 (2017).
- 1005 49. Wang, Z. *et al.* Structure of the Marine Siphovirus TW1: Evolution of Capsid-Stabilizing  
1006 Proteins and Tail Spikes. *Structure* **26**, 238-248.e3 (2018).
- 1007 50. Hardy, J. M. *et al.* The architecture and stabilisation of flagellotropic tailed bacteriophages.  
1008 *Nat Commun* **11**, 3748 (2020).
- 1009 51. Podgorski, J. *et al.* Structures of Three Actinobacteriophage Capsids: Roles of Symmetry and  
1010 Accessory Proteins. *Viruses* **12**, 294 (2020).
- 1011 52. Tivol, W. F., Briegel, A. & Jensen, G. J. An Improved Cryogen for Plunge Freezing. *Microsc*  
1012 *Microanal* **14**, 375–379 (2008).
- 1013 53. Zivanov, J. *et al.* New tools for automated high-resolution cryo-EM structure determination  
1014 in RELION-3. *eLife* **7**, e42166 (2018).
- 1015 54. Jumper, J. *et al.* Highly accurate protein structure prediction with AlphaFold. *Nature* **596**,  
1016 583–589 (2021).
- 1017 55. Goddard, T. D. *et al.* UCSF ChimeraX: Meeting modern challenges in visualization and  
1018 analysis. *Protein Sci.* **27**, 14–25 (2018).
- 1019 56. Emsley, P., Lohkamp, B., Scott, W. G. & Cowtan, K. Features and development of *Coot*. *Acta*  
1020 *Crystallogr D Biol Crystallogr* **66**, 486–501 (2010).
- 1021 57. Clarke, O. Coot-trimmings. <https://github.com/olibclarke/coot-trimmings>.
- 1022 58. Liebschner, D. *et al.* Macromolecular structure determination using X-rays, neutrons and  
1023 electrons: recent developments in Phenix. *Acta Cryst D* **75**, 861–877 (2019).

- 1024 59. Croll, T. I. ISOLDE: a physically realistic environment for model building into low-resolution  
1025 electron-density maps. *Acta Cryst D* **74**, 519–530 (2018).
- 1026 60. Russell, D. A. & Hatfull, G. F. PhagesDB: the actinobacteriophage database. *Bioinformatics*  
1027 **33**, 784–786 (2017).
- 1028 61. Katoh, K. & Standley, D. M. MAFFT Multiple Sequence Alignment Software Version 7:  
1029 Improvements in Performance and Usability. *Molecular Biology and Evolution* **30**, 772–780  
1030 (2013).
- 1031 62. Minh, B. Q. *et al.* IQ-TREE 2: New Models and Efficient Methods for Phylogenetic Inference  
1032 in the Genomic Era. *Molecular Biology and Evolution* **37**, 1530–1534 (2020).
- 1033 63. Kalyaanamoorthy, S., Minh, B. Q., Wong, T. K. F., von Haeseler, A. & Jermini, L. S.  
1034 ModelFinder: fast model selection for accurate phylogenetic estimates. *Nature Methods* **14**,  
1035 587–589 (2017).
- 1036 64. Rambaut, A. *FigTree v1. 4.* (2012).
- 1037 65. Cresawn, S. G. *et al.* Phamerator: a bioinformatic tool for comparative bacteriophage  
1038 genomics. *BMC Bioinformatics* **12**, 395 (2011).
- 1039 66. Ravantti, J., Bamford, D. & Stuart, D. I. Automatic comparison and classification of protein  
1040 structures. *J Struct Biol* **183**, 47–56 (2013).
- 1041 67. Mönttinen, H. A. M., Ravantti, J. J. & Poranen, M. M. Common Structural Core of Three-  
1042 Dozen Residues Reveals Intersuperfamily Relationships. *Molecular Biology and Evolution* **33**,  
1043 1697–1710 (2016).
- 1044 68. Pope, W. H. & Hatfull, G. F. Adding pieces to the puzzle: New insights into bacteriophage  
1045 diversity from integrated research-education programs. *Bacteriophage* **5**, e1084073 (2015).

- 1046 69. Steinegger, M. & Söding, J. MMseqs2 enables sensitive protein sequence searching for the  
1047 analysis of massive data sets. *Nat Biotechnol* **35**, 1026–1028 (2017).
- 1048 70. Krupovic, M. & Koonin, E. V. Multiple origins of viral capsid proteins from cellular ancestors.  
1049 *PNAS* **114**, E2401–E2410 (2017).
- 1050 71. Ravantti, J. J., Martinez-Castillo, A. & Abrescia, N. G. A. Superimposition of Viral Protein  
1051 Structures: A Means to Decipher the Phylogenies of Viruses. *Viruses* **12**, 1146 (2020).
- 1052 72. Oh, B., Moyer, C. L., Hendrix, R. W. & Duda, R. L. The delta domain of the HK97 major capsid  
1053 protein is essential for assembly. *Virology* **456–457**, 171–178 (2014).
- 1054 73. Mönttinen, H. A. M., Ravantti, J. J. & Poranen, M. M. Structural comparison strengthens the  
1055 higher-order classification of proteases related to chymotrypsin. *PLOS ONE* **14**, e0216659  
1056 (2019).
- 1057 74. Ross, P. D. *et al.* Crosslinking renders bacteriophage HK97 capsid maturation irreversible  
1058 and effects an essential stabilization. *EMBO J* **24**, 1352–1363 (2005).
- 1059 75. Duda, R. L., Martincic, K., Xie, Z. & Hendrix, R. W. Bacteriophage HK97 head assembly. *FEMS*  
1060 *Microbiol Rev* **17**, 41–46 (1995).
- 1061 76. Gilakjan, Z. A. & Kropinski, A. M. Cloning and Analysis of the Capsid Morphogenesis Genes  
1062 of *Pseudomonas aeruginosa* Bacteriophage D3: Another Example of Protein Chain Mail? *J*  
1063 *Bacteriol* **181**, 7221–7227 (1999).
- 1064 77. Fortier, L.-C., Bransi, A. & Moineau, S. Genome Sequence and Global Gene Expression of  
1065 Q54, a New Phage Species Linking the 936 and c2 Phage Species of *Lactococcus lactis*. *J*  
1066 *Bacteriol* **188**, 6101–6114 (2006).

- 1067 78. Hatfult, G. F. & Sarkis, G. J. DNA sequence, structure and gene expression of  
1068 mycobacteriophage L5: a phage system for mycobacterial genetics. *Molecular Microbiology*  
1069 **7**, 395–405 (1993).
- 1070 79. Molineux, I. J. & Panja, D. Popping the cork: mechanisms of phage genome ejection. *Nat*  
1071 *Rev Microbiol* **11**, 194–204 (2013).
- 1072 80. D’Lima, N. G. & Teschke, C. M. A Molecular Staple: D-Loops in the I Domain of  
1073 Bacteriophage P22 Coat Protein Make Important Intercapsomer Contacts Required for  
1074 Procapsid Assembly. *Journal of Virology* (2015) doi:10.1128/JVI.01629-15.
- 1075 81. Steven, A. C., Greenstone, H. L., Booy, F. P., Black, L. W. & Ross, P. D. Conformational  
1076 changes of a viral capsid protein: Thermodynamic rationale for proteolytic regulation of  
1077 bacteriophage T4 capsid expansion, co-operativity, and super-stabilization by soc binding.  
1078 *Journal of Molecular Biology* **228**, 870–884 (1992).
- 1079 82. Tso, D., Hendrix, R. W. & Duda, R. L. Transient contacts on the exterior of the HK97  
1080 procapsid that are essential for capsid assembly. *J Mol Biol* **426**, 2112–2129 (2014).
- 1081 83. Hagan, R. M. *et al.* NMR Spectroscopic and Theoretical Analysis of a Spontaneously Formed  
1082 Lys-Asp Isopeptide Bond. *Angew Chem Int Ed Engl* **49**, 8421–8425 (2010).
- 1083 84. Suhanovsky, M. M. & Teschke, C. M. Bacteriophage P22 capsid size determination: Roles for  
1084 the coat protein telokin-like domain and the scaffolding protein amino-terminus. *Virology*  
1085 **417**, 418–429 (2011).
- 1086 85. Earnshaw, W. C., King, J., Harrison, S. C. & Eiserling, F. A. The structural organization of DNA  
1087 packaged within the heads of T4 wild-type, isometric and giant bacteriophages. *Cell* **14**,  
1088 559–568 (1978).



- 1089 86. Ross, A., Ward, S. & Hyman, P. More Is Better: Selecting for Broad Host Range  
1090 Bacteriophages. *Front Microbiol* **7**, 1352 (2016).
- 1091 87. Battistuzzi, F. U., Feijao, A. & Hedges, S. B. A genomic timescale of prokaryote evolution:  
1092 insights into the origin of methanogenesis, phototrophy, and the colonization of land. *BMC*  
1093 *Evol Biol* **4**, 44 (2004).
- 1094  
1095  
1096  
1097  
1098  
1099  
1100  
1101  
1102  
1103  
1104  
1105  
1106  
1107  
1108  
1109  
1110  
1111

1112 **Supporting information**

1113 **Supporting Table 1.** Host and bacteriophage information for each bacteriophage used

1114 in this study.

| Phage name       | MCP<br>pham | Cluster/Sub-<br>cluster | Host                                                 | Genome<br>length | Growth<br>temp.<br>(°C) |
|------------------|-------------|-------------------------|------------------------------------------------------|------------------|-------------------------|
| <i>Oxtober96</i> | 15199       | EA/EA1                  | <i>Microbacterium<br/>foliorum</i> NRRL B-24224      | 41798            | 32                      |
| <i>Bridgette</i> | 15199       | FA                      | <i>Arthrobacter globiformis</i> B-<br>2979           | 43113            | 32                      |
| <i>Muddy</i>     | 15199       | AB                      | <i>Mycobacterium<br/>smegmatis mc<sup>2</sup>155</i> | 48228            | 37                      |
| <i>Bobbi</i>     | 15199       | F/F1                    | <i>Mycobacterium<br/>smegmatis mc<sup>2</sup>155</i> | 59179            | 37                      |
| <i>Adephagia</i> | 15199       | K/K1                    | <i>Mycobacterium<br/>smegmatis mc<sup>2</sup>155</i> | 59646            | 37                      |
| <i>Cain</i>      | 15199       | K/K6                    | <i>Mycobacterium<br/>smegmatis mc<sup>2</sup>155</i> | 60813            | 22                      |
| <i>Ziko</i>      | 15199       | DP                      | <i>Gordonia terrae</i> 3612                          | 68860            | 32                      |
| <i>Ogopogo</i>   | 57445       | F/F1                    | <i>Mycobacterium<br/>smegmatis mc<sup>2</sup>155</i> | 56867            | 37                      |
| <i>Cozz</i>      | 57445       | CT                      | <i>Gordonia terrae</i> 3612                          | 46600            | 32                      |
| <i>Che8</i>      | 4631        | F/F1                    | <i>Mycobacterium<br/>smegmatis mc<sup>2</sup>155</i> | 59471            | 37                      |

1115

1116 **Supporting Table 2.** Cryo-EM collection parameters, analysis, and final resolutions.

1117

1118

| <b>Data collection</b>    | Muddy                    | Bridgette                      | Oxtober96                      | Ziko                           | Bob                      | Adephagia                      | Che8                     | Cozz                           | Ogopogo                  | Cain                           |
|---------------------------|--------------------------|--------------------------------|--------------------------------|--------------------------------|--------------------------|--------------------------------|--------------------------|--------------------------------|--------------------------|--------------------------------|
| Microscope                | Titan<br>Krios<br>3Gi    |                                |                                |                                |                          |                                |                          |                                |                          |                                |
| High Tension / kV         | 300                      |                                |                                |                                |                          |                                |                          |                                |                          |                                |
| Pixel size / Å            | 1.076                    | 0.6615                         | 0.39915                        | 0.4008                         | 0.83                     | 0.4008                         | 0.83                     | 0.413                          | 0.83                     | 0.4008                         |
| Spherical aberration / mm | 2.7                      |                                |                                |                                |                          |                                |                          |                                |                          |                                |
| Nominal defocus / μm      | 1 to 2.5                 | 1 to 3                         | 1 to 3                         | 1 to 3                         | 1 to 3                   | 1 to 2.5                       | 1 to 3                   | 1 to 3                         | 1 to 3                   | 1 to 2.5                       |
| Detector (mode)           | Falcon III<br>(Counting) | Gatan K3<br>(super resolution) | Gatan K3<br>(super resolution) | Gatan K3<br>(super resolution) | Falcon III<br>(Counting) | Gatan K3<br>(super resolution) | Falcon III<br>(Counting) | Gatan K3<br>(super resolution) | Falcon III<br>(Counting) | Gatan K3<br>(super resolution) |

|                                                | ing<br>mode) |               |               | resol<br>ution<br>) | unti<br>ng<br>mod<br>e) |               | mode<br>)     | resol<br>ution) |               | resol<br>ution<br>) |
|------------------------------------------------|--------------|---------------|---------------|---------------------|-------------------------|---------------|---------------|-----------------|---------------|---------------------|
| Total exposure<br>dose / eÅ <sup>-2</sup>      | 50           | 23            | 30            | 26                  | 30                      | 24            | 30            | 24              | 30            | 25                  |
| Number of<br>frames                            | 48           | 40            | 32            | 30                  | 32                      | 50            | 32            | 30              | 32            | 30                  |
| Number of<br>micrographs                       | 1027         | 4303          | 10437         | 5058                | 191<br>5                | 5688          | 1201          | 2799            | 2220          | 4368                |
| Number of<br>particles in<br>final refinement  | 25244        | 13926         | 13198         | 3595<br>0           | 189<br>69               | 51783         | 1497<br>2     | 4361<br>1       | 18736         | 3187<br>8           |
| Extract box<br>size (fourier<br>crop box size) | 800<br>(800) | 1600<br>(800) | 2048<br>(800) | 2400<br>(750)       | 102<br>4<br>(686<br>)   | 2400<br>(800) | 1024<br>(800) | 2400<br>(800)   | 1024<br>(800) | 2400<br>(800)       |
| Final pixel size<br>used in<br>reconstruction  | 1.076        | 1.323         | 1.02182       | 1.28<br>256         | 1.24                    | 1.2024        | 1.062<br>4    | 1.239           | 1.0624        | 1.202<br>4          |

|                                       |        |        |        |        |        |        |        |        |        |        |
|---------------------------------------|--------|--------|--------|--------|--------|--------|--------|--------|--------|--------|
| Ewald sphere correction mask diameter | 710    | 700    | 650    | 760    | 750    | 760    | 750    | 670    | 750    | 760    |
| Symmetry                              | I (I4) | I (I1) | I (I1) | I (I4) | I (I1) | I (I1) | I (I1) | I (I1) | I (I1) | I (I2) |
| Resolution (FSC 0.143)                | 2.7    | 4      | 2.2    | 2.6    | 2.5    | 2.4    | 2.5    | 2.6    | 2.7    | 2.9    |

1119

1120 **Supporting Table 3.** RMSD values of the Bobi-like (pham 15199) cryo-EM derived  
 1121 major capsid protein models when compared to Bobi. Values are calculated using the  
 1122 Matchmaker command in ChimeraX with default settings.

1123

*Bacteriophage* *RMSD (Å) compared to Bobi*

|                  |     |
|------------------|-----|
| <i>Muddy</i>     | 1.0 |
| <i>Bridgette</i> | 1.2 |
| <i>October96</i> | 1.1 |
| <i>Ziko</i>      | 1.1 |
| <i>Adephagia</i> | 0.6 |

1124

1125

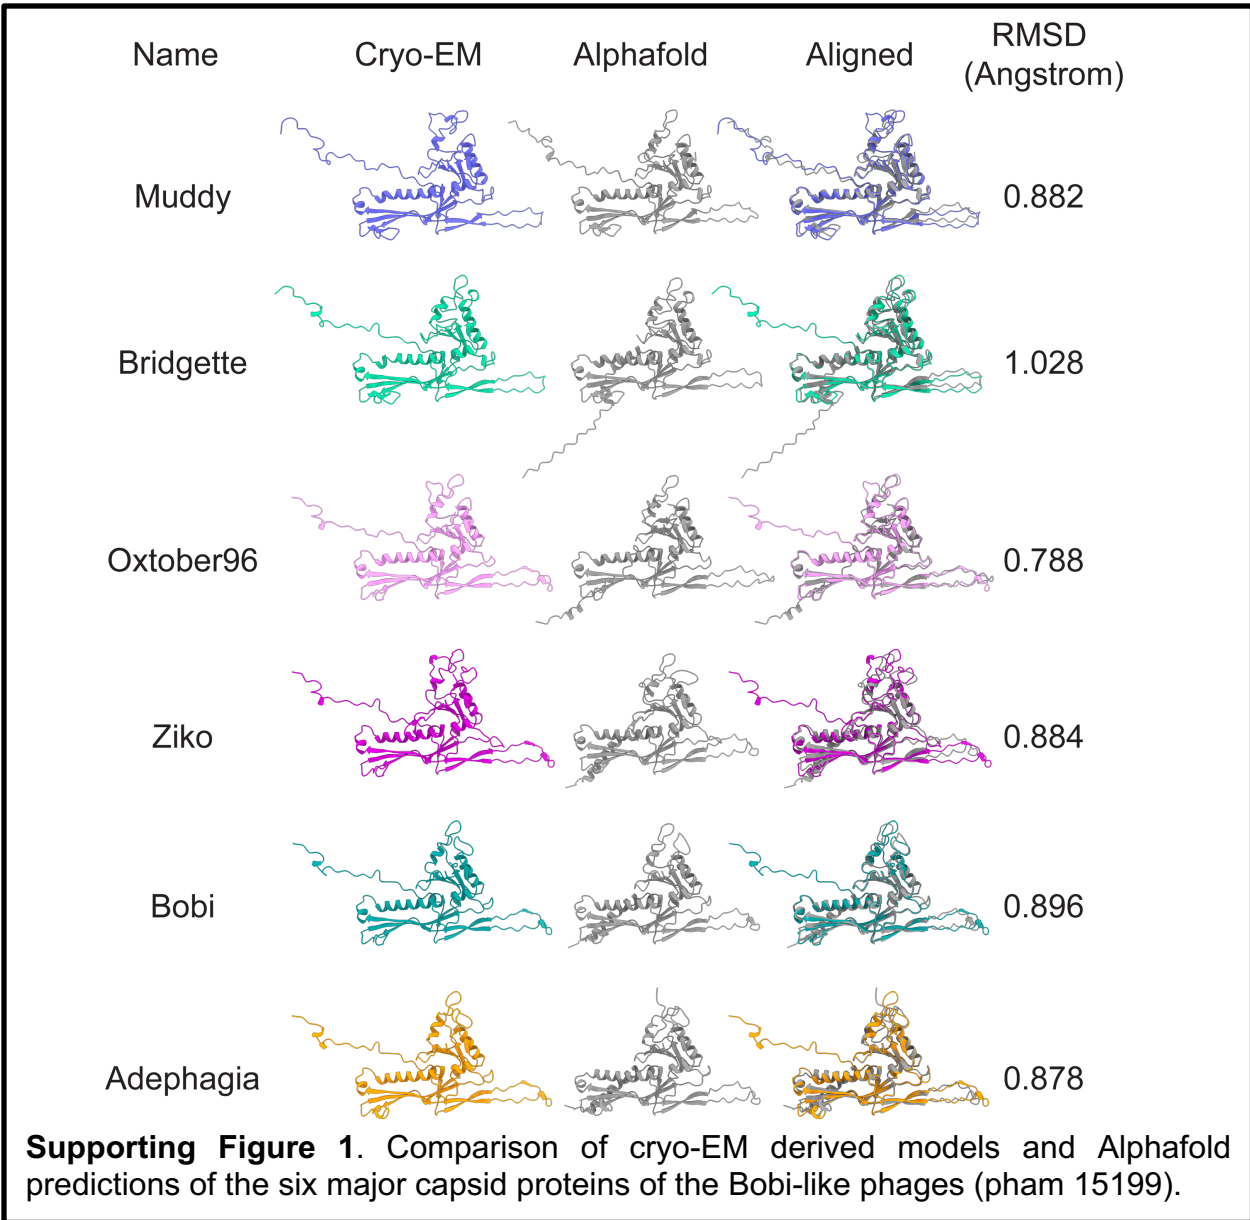

1126

1127

1128

1129

1130

1131

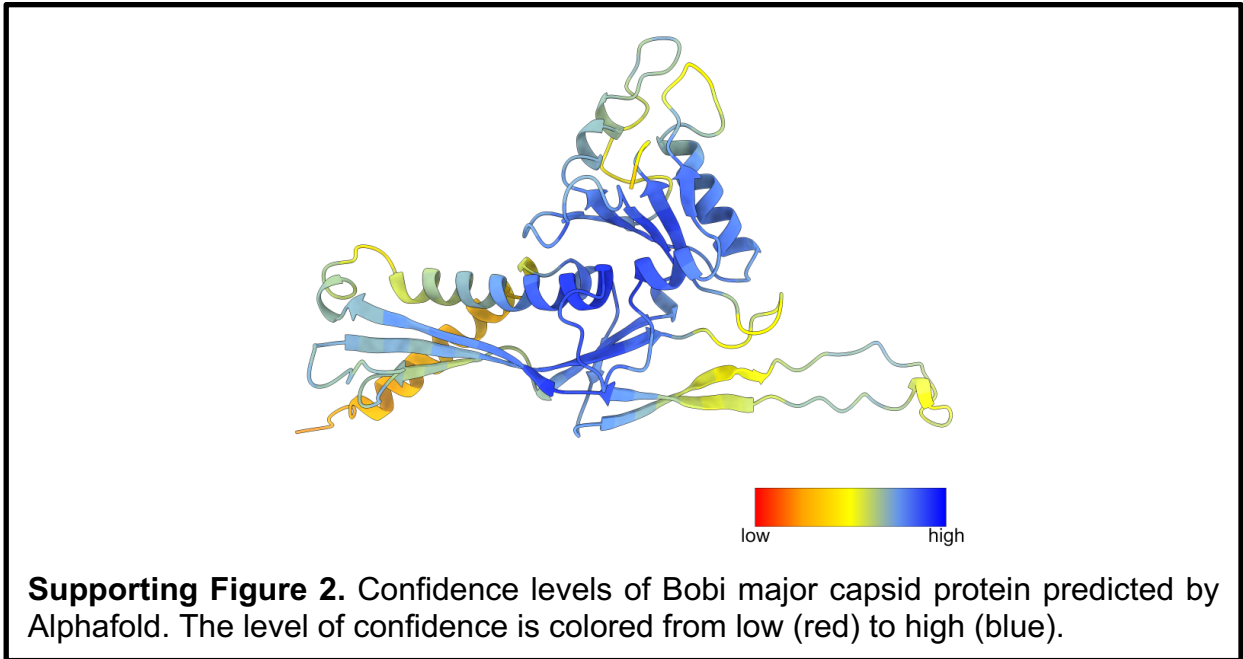

1132

1133

1134

1135

1136

1137



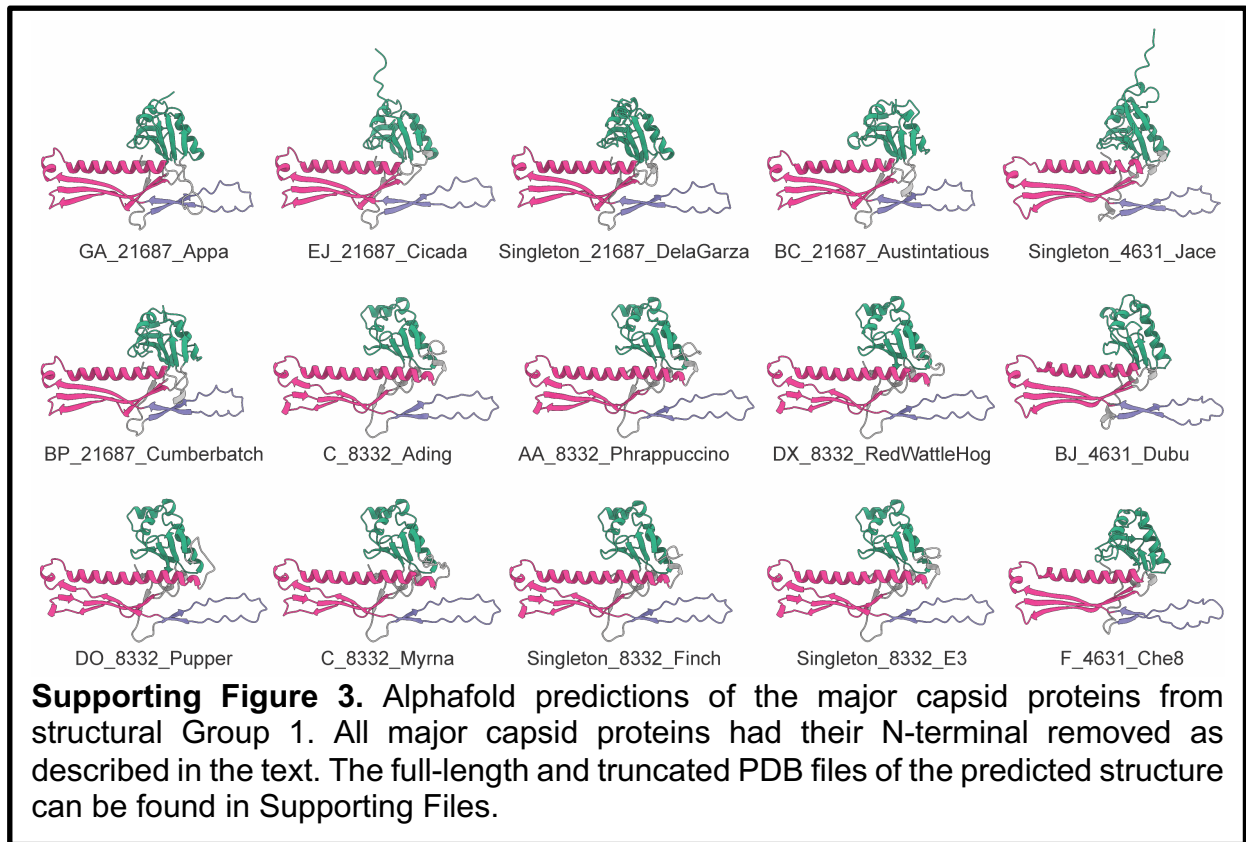

1138

1139

1140

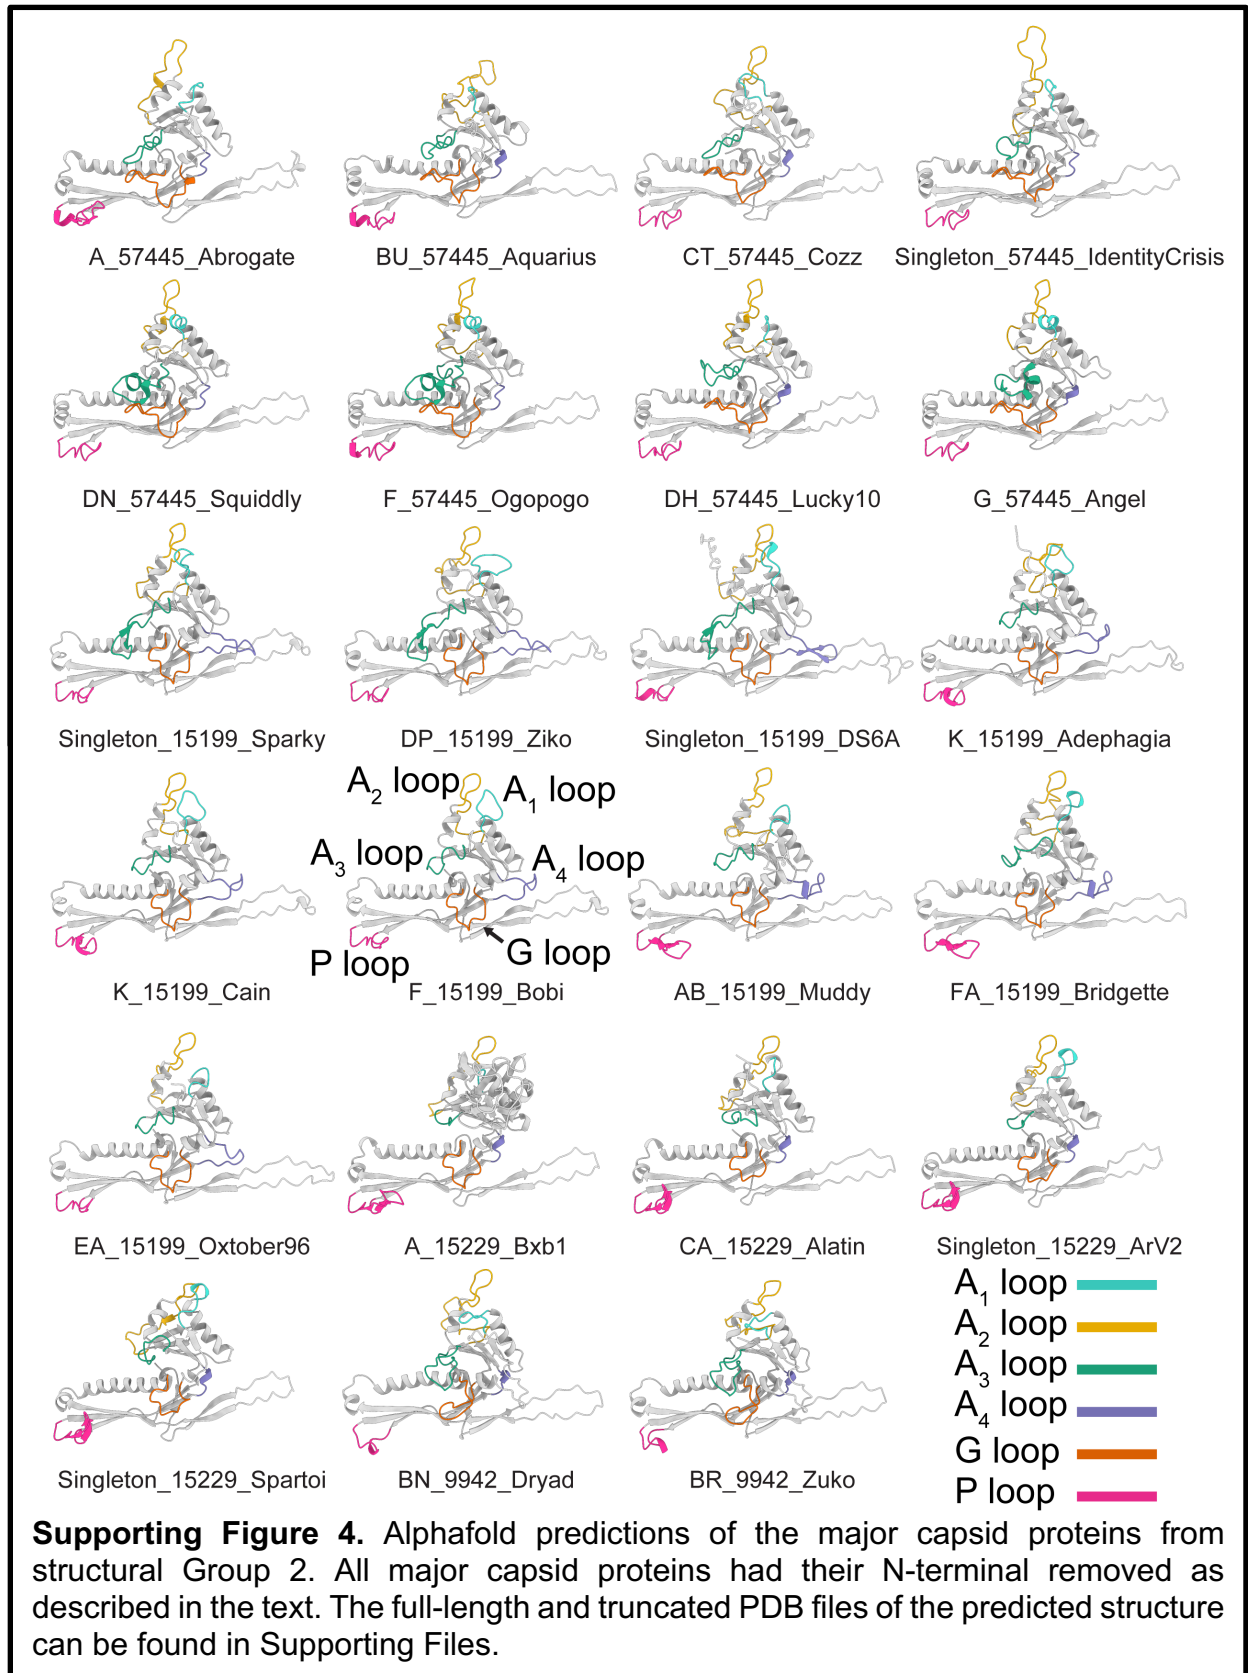

1142

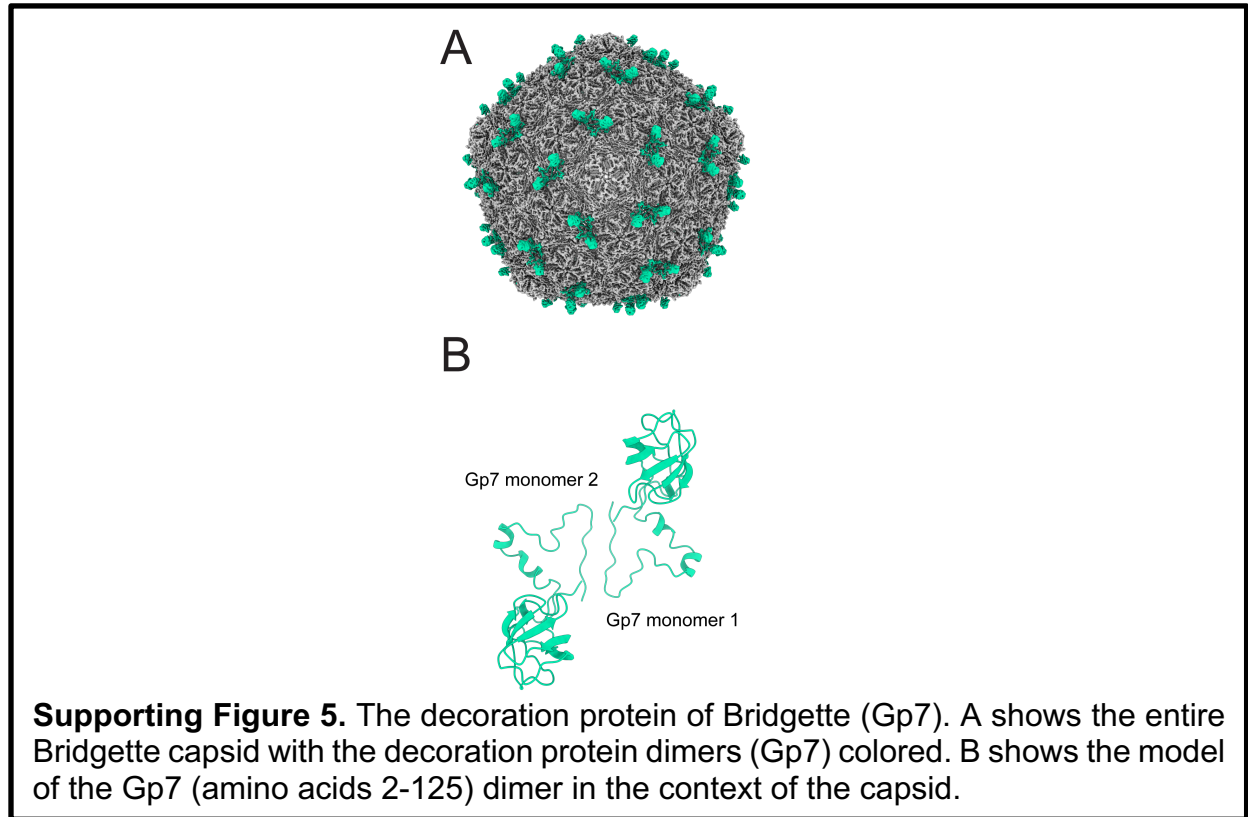

1143

1144

1145

1146

1147

1148

1149

1150

1151

1152

1153

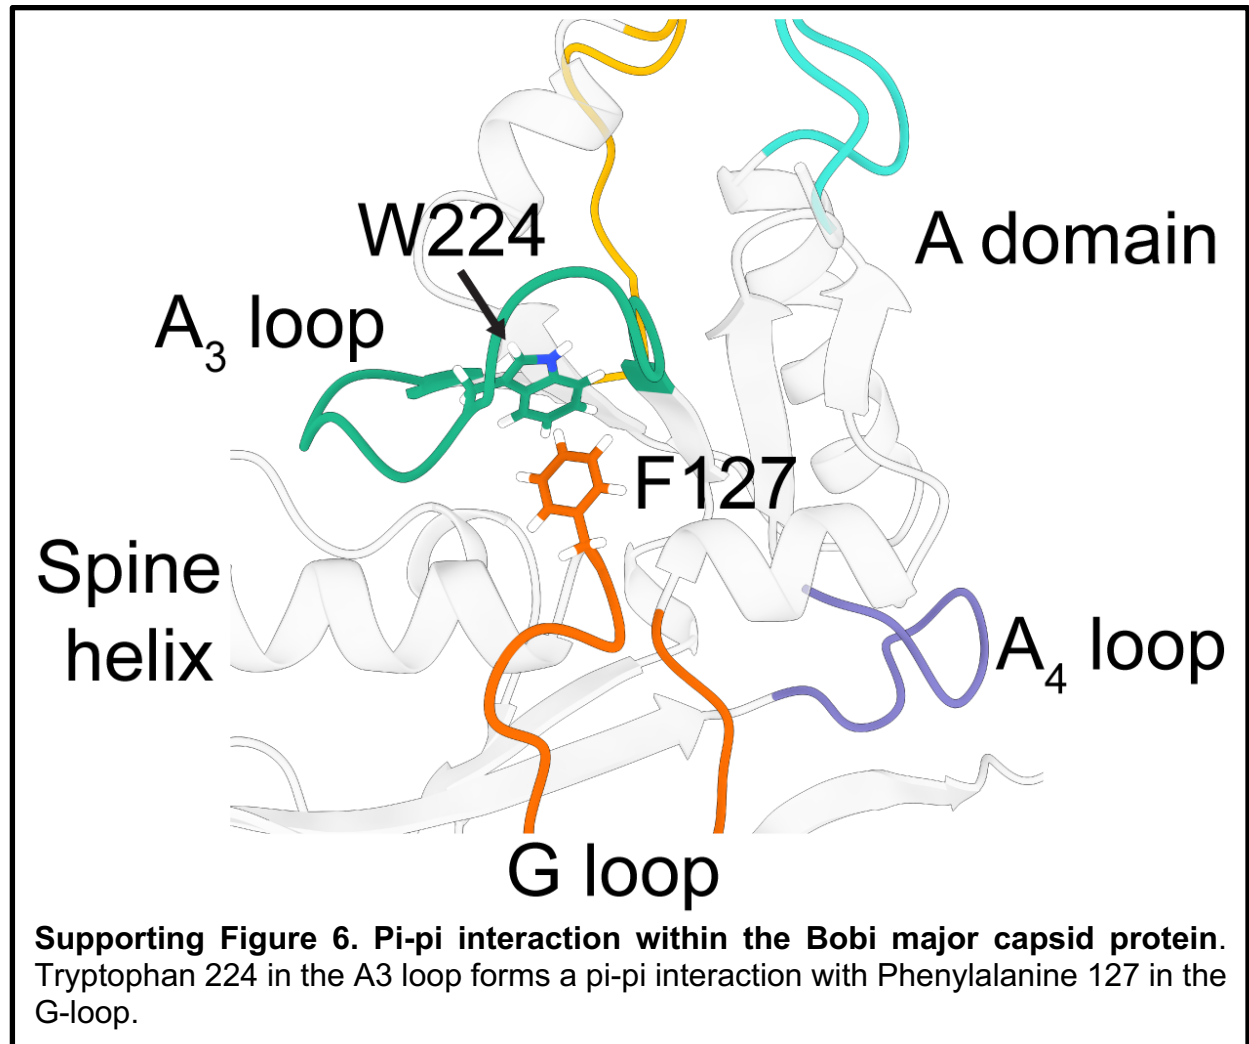

1154

1155

1156

1157

1158

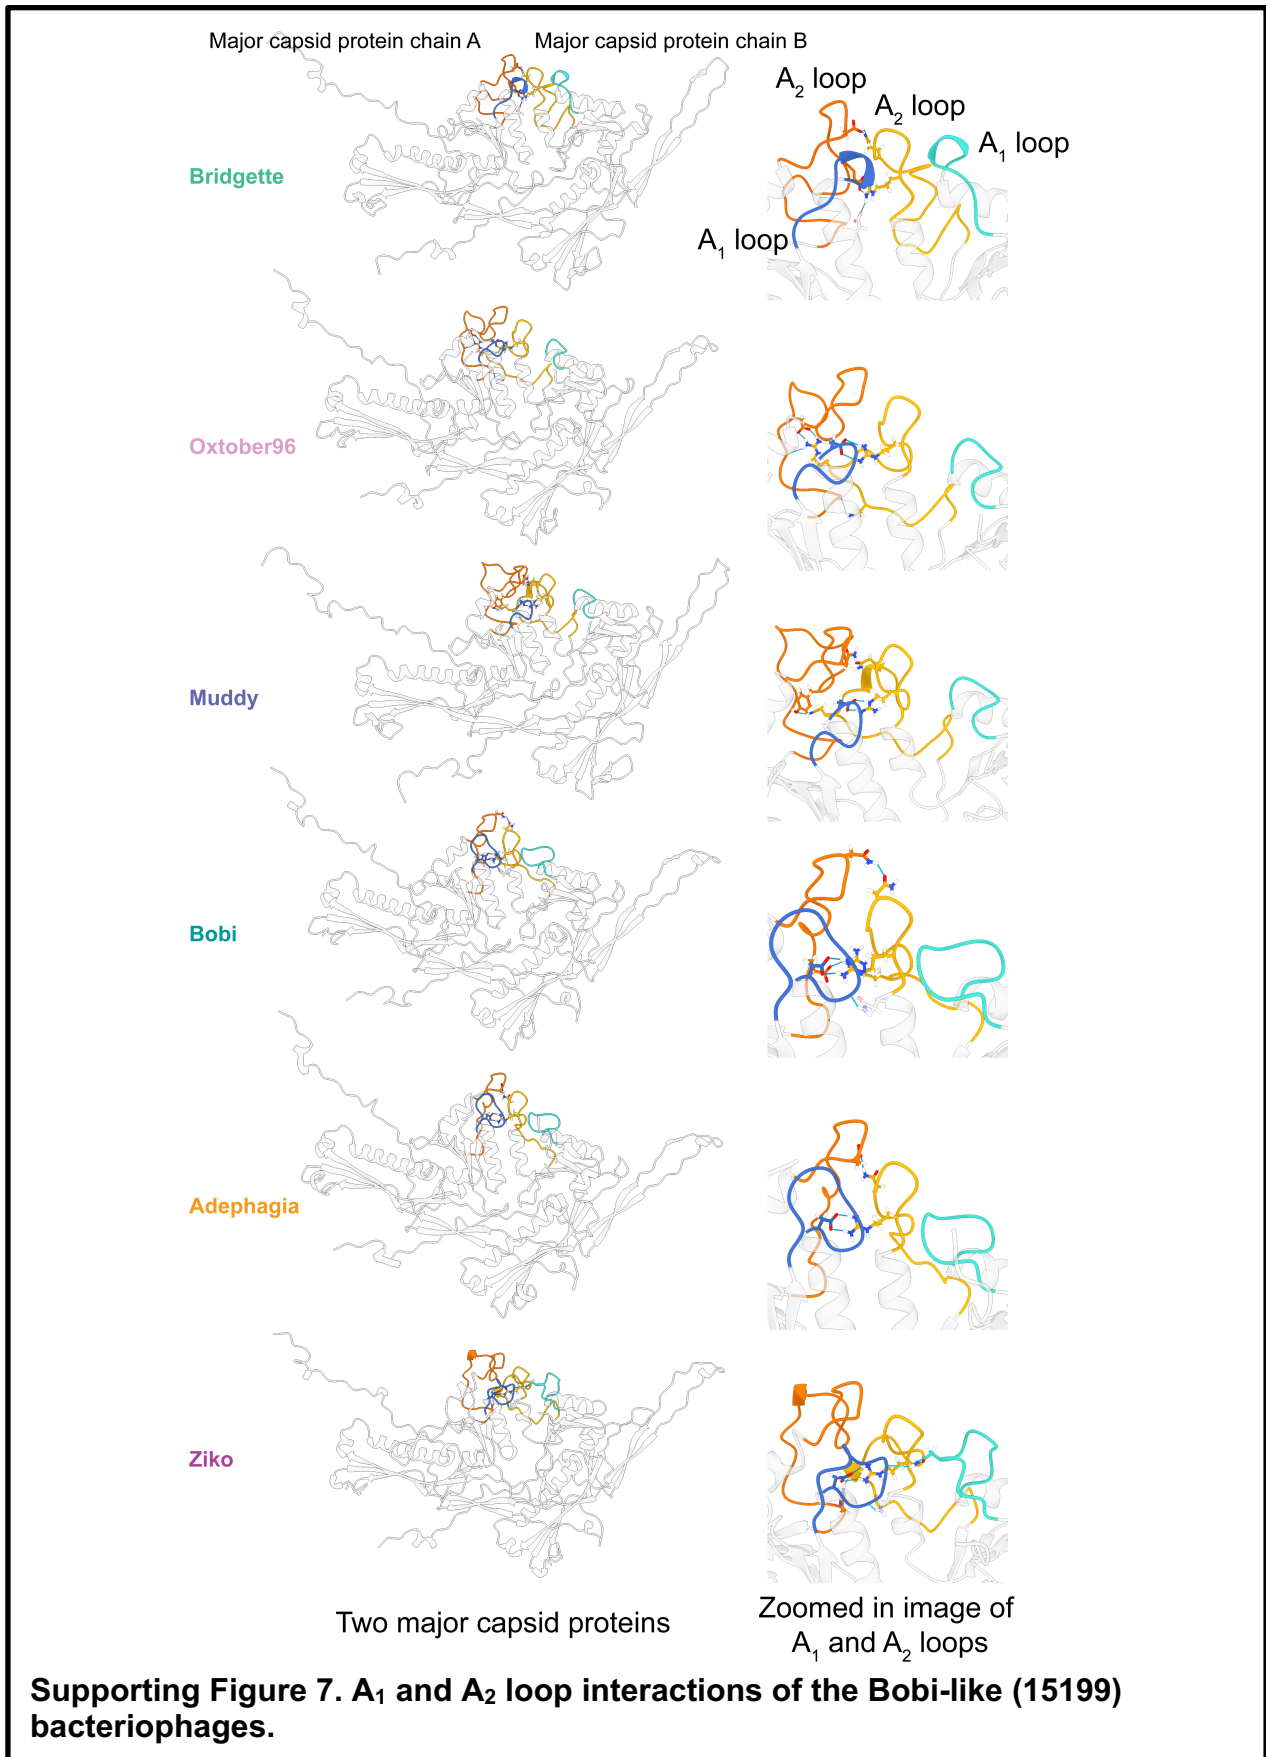

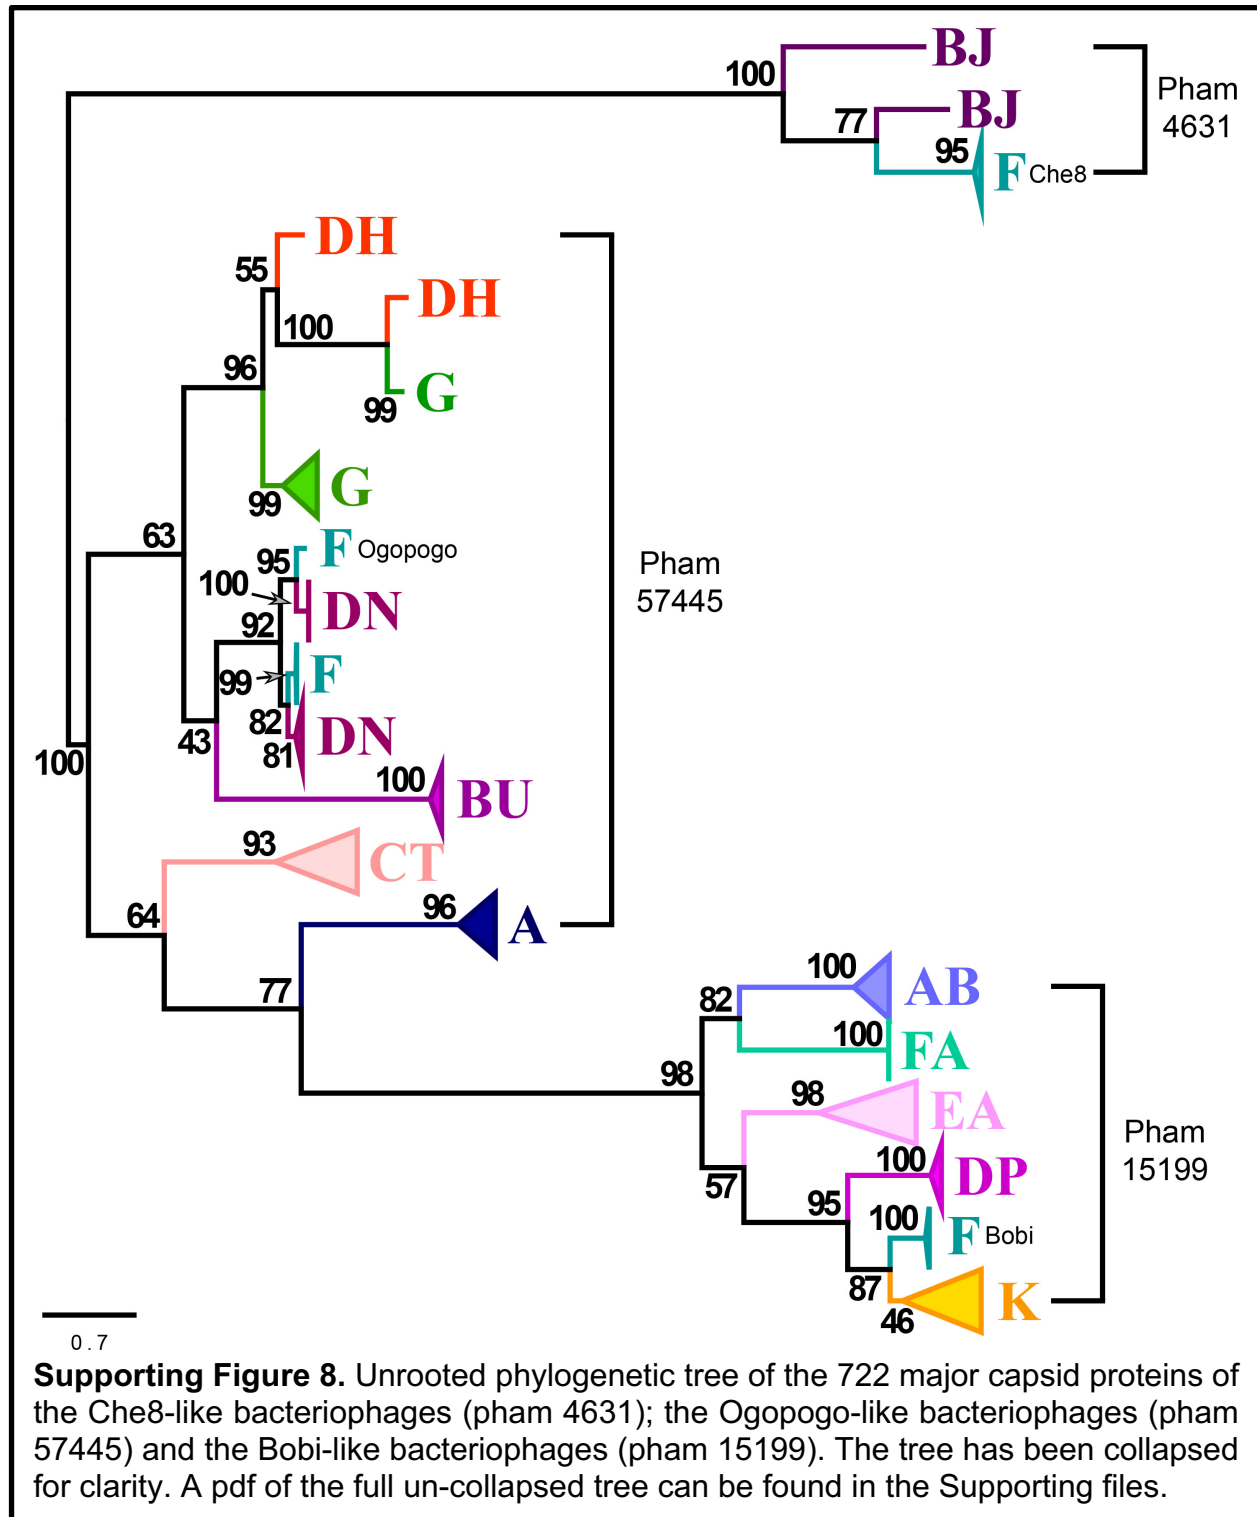

1160

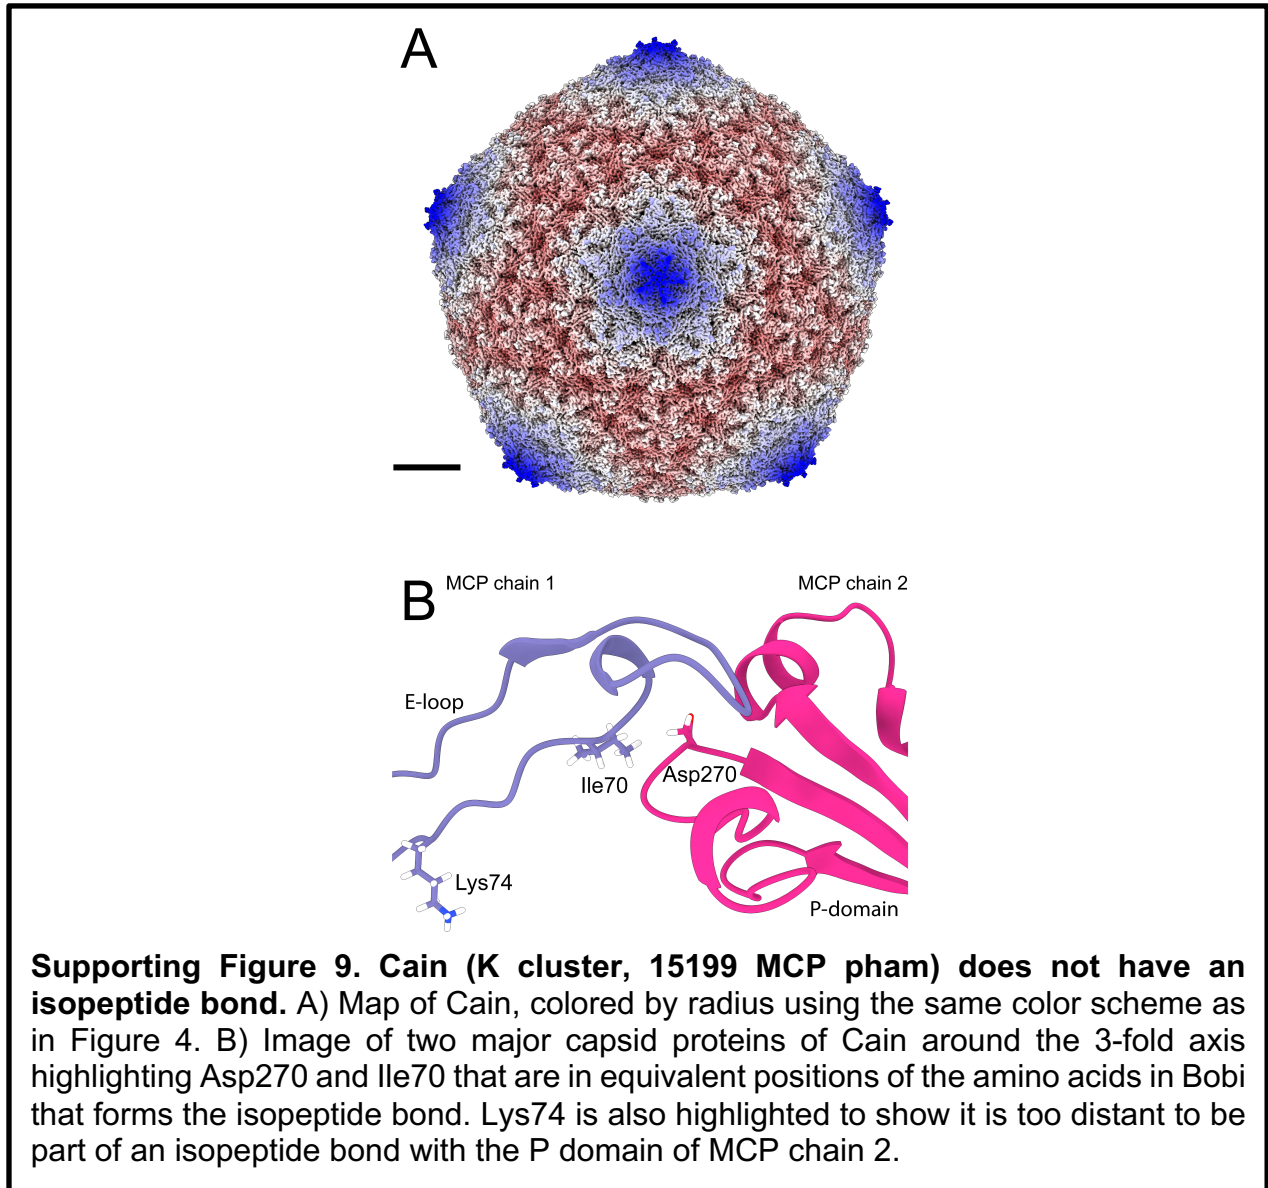

1161

1162

1163

1164

1165

1166



1167

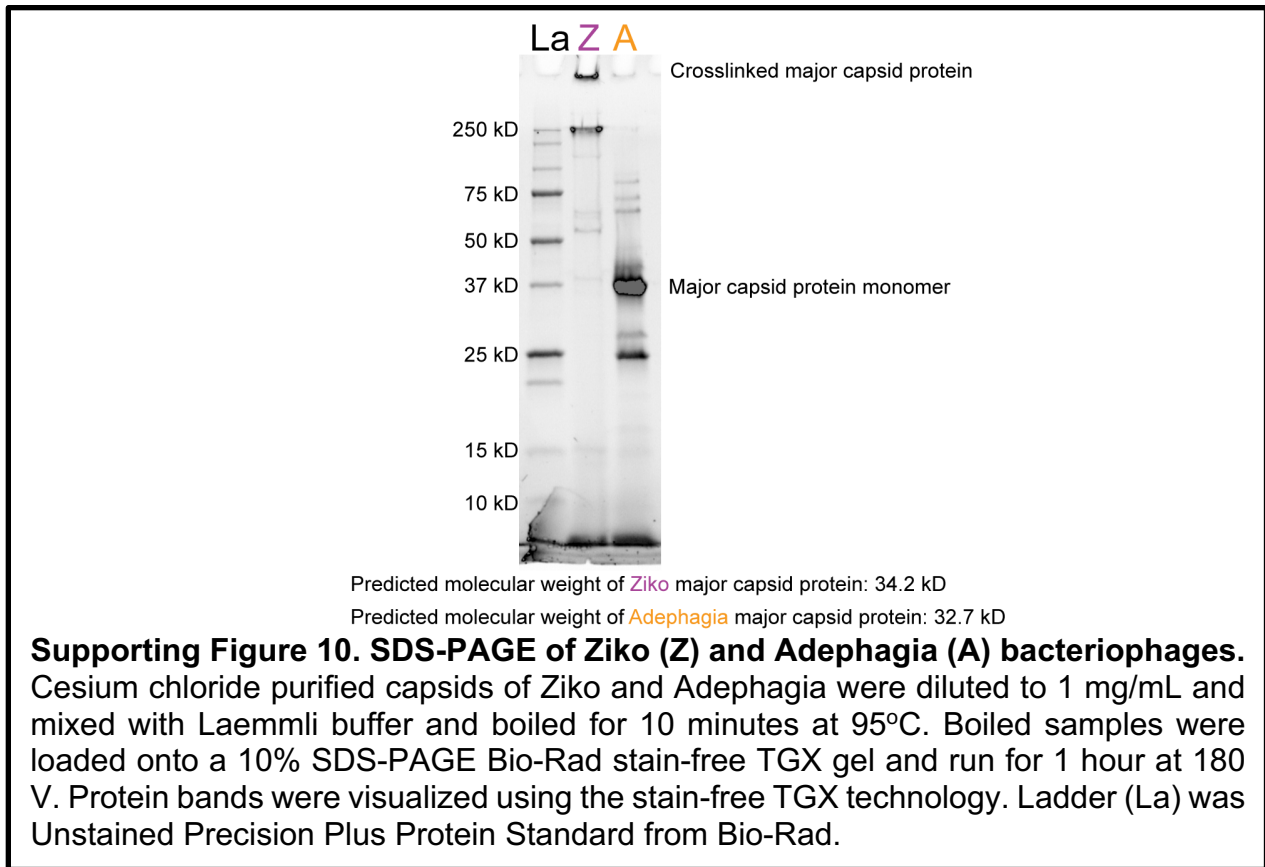

1168

1169

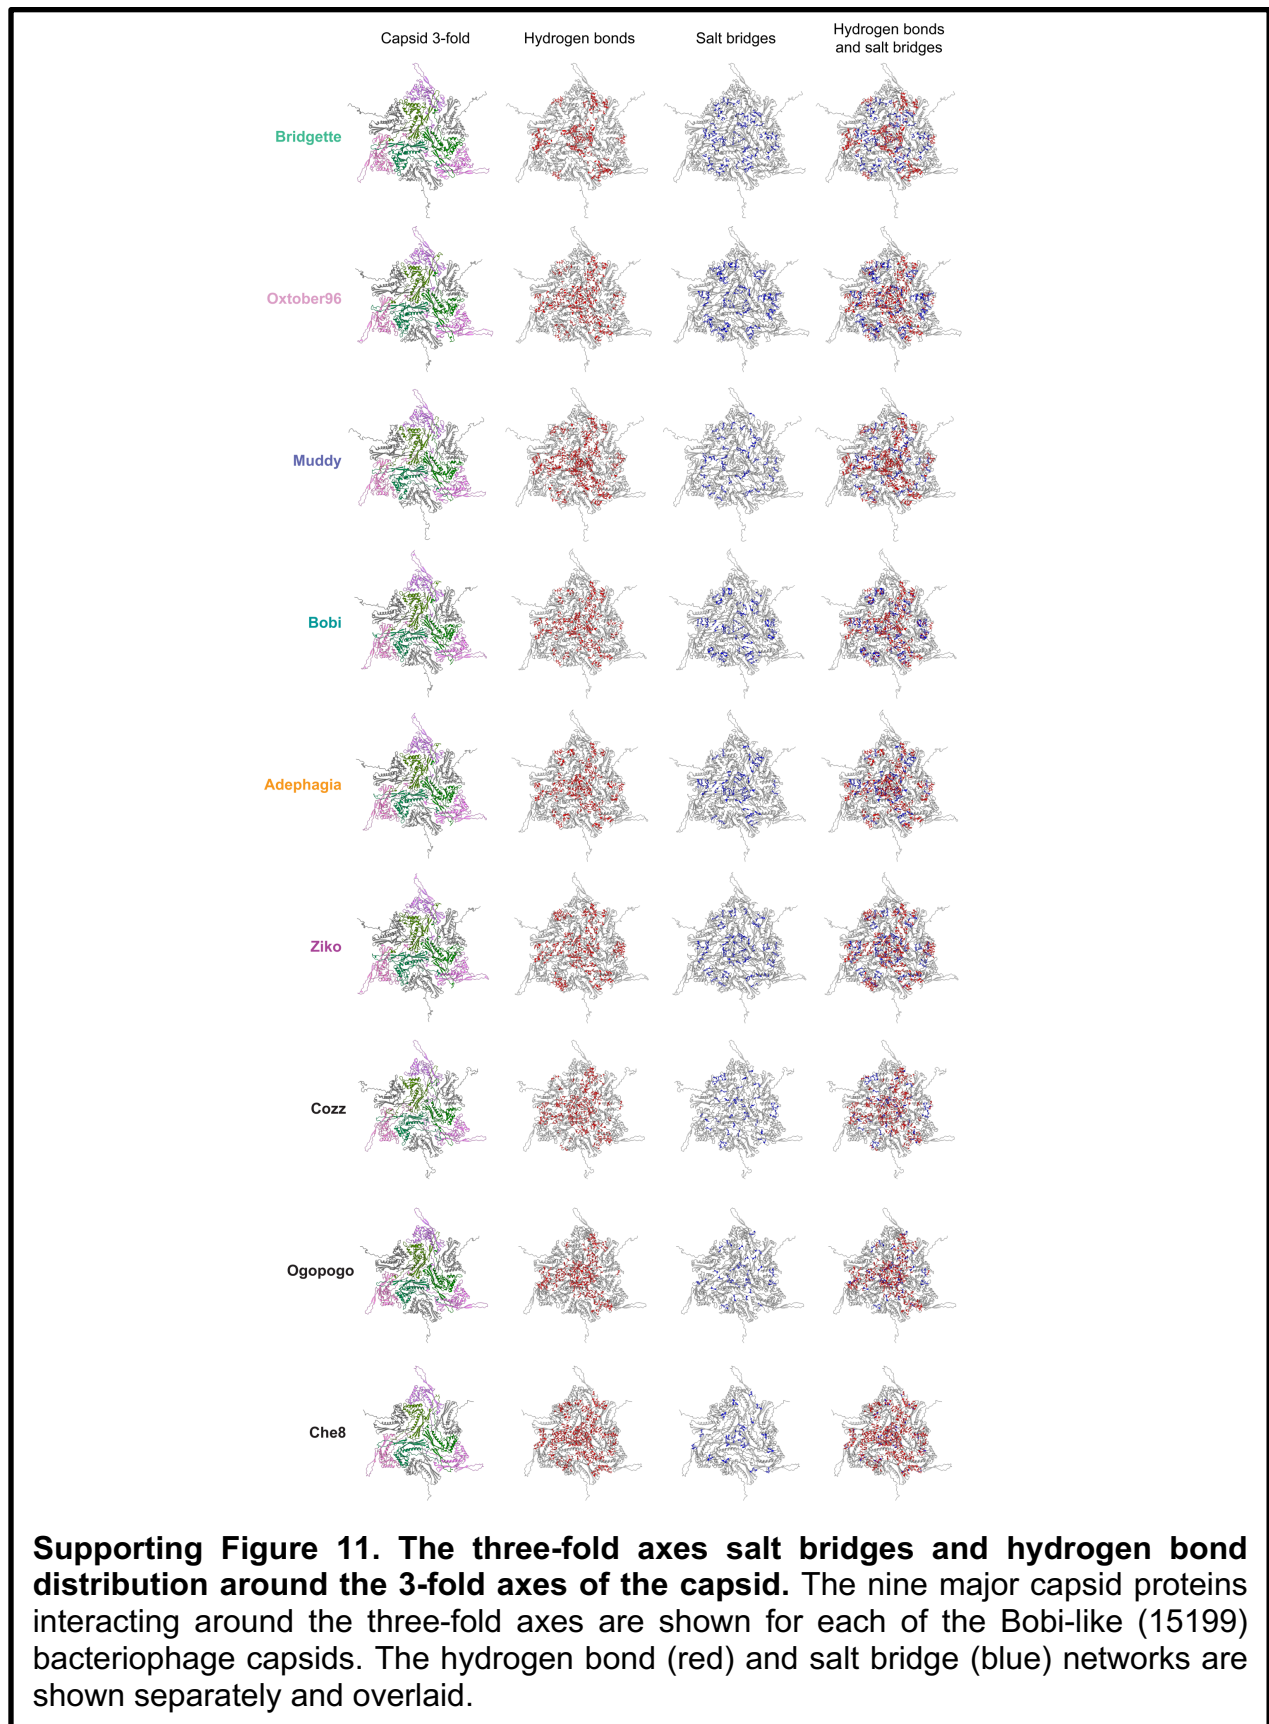

Source: https://www.biorxiv.org/content/10.1101/2022.09.09.507160v1.full.pdf
